# Fast voltage sensitivity in retinal pigment epithelium: sodium channels and their novel role in phagocytosis

Julia K. Johansson<sup>1</sup>✉, Teemu O. Ihalainen<sup>1,2</sup>✉ Heli Skottman<sup>2</sup> and Soile Nymark<sup>1\*</sup>

1 Faculty of Biomedical Sciences and Engineering, BioMediTech Institute, Tampere University of Technology, Tampere, Finland

2 Faculty of Medicine and Life Sciences, BioMediTech Institute, University of Tampere, Finland

✉ Equal contributions

\* Corresponding author

## Abstract

Despite the discoveries of voltage-gated sodium channels ( $\text{Na}_v$ ) from a number of non-excitabile cell types, the presence of  $\text{Na}_v$ -mediated currents in cells of the retinal pigment epithelium (RPE) has been dismissed as a cell culture artifact. Here, we challenge this notion by demonstrating functional  $\text{Na}_v1.4$ - $\text{Na}_v1.6$  and  $\text{Na}_v1.8$  channels in human embryonic stem cell derived and mouse RPE. Importantly, we show that  $\text{Na}_v$ s are involved in photoreceptor outer segment phagocytosis: blocking their activity significantly reduces the efficiency of this process. Consistent with this role,  $\text{Na}_v1.8$  co-localizes with the endosomal marker Rab7 and, during phagocytosis, with opsin.  $\text{Na}_v1.4$  localizes strongly to the cell-cell junctions together with the gap junction protein Connexin 43. During phagocytosis, both are localized to the phagosomes with a concurrent decrease in the junctional localization. Our study demonstrates that  $\text{Na}_v$ s give the capacity of fast electrical signaling to RPE and that  $\text{Na}_v$ s play a novel role in photoreceptor outer segment phagocytosis.

## Introduction

In the vertebrate eye, the retinal pigment epithelium (RPE) forms a barrier between the retina and the choroid<sup>1-3</sup>. Its cells are associated closely with photoreceptors: their apical sides surround the outer segments with long microvilli, and the basolateral sides are attached to Bruch's membrane, an extracellular matrix separating the RPE from the choroid<sup>3,4</sup>. The RPE has many functions that are vital to retinal maintenance and vision, such as maintaining the visual cycle, secreting important growth factors, delivering nutrients to the photoreceptors from the blood stream while removing metabolic end products, and absorbing scattered light<sup>1,3</sup>. Most importantly, though, the RPE maintains ionic homeostasis in the subretinal space<sup>5</sup> and sustains photoreceptor renewal by phagocytosing their shed outer segments<sup>1,6</sup>. Phagocytosis is highly essential for vision and it is under strict diurnal control, initiated at light onset for rods and at light offset for cones<sup>7,8</sup>. This evolutionary conserved molecular pathway is receptor mediated and precisely regulated, however the exact signaling cascades are still not completely understood<sup>9</sup>. Recent studies imply the importance of specific ion channels in this process including the L-type calcium currents linked to calcium-dependent potassium and chloride channels<sup>10</sup>.

Since the first single-cell recordings from RPE cells in 1988<sup>11</sup>, a large variety of different ion channels have been identified in them<sup>5</sup>. Much of this work was done on RPE cultured from various species, and some channels have been found only in cultured RPE<sup>12-14</sup>. Thus, there appear to be important differences between freshly isolated and cultured RPE<sup>15</sup>. One of the channel types identified in cultured RPE is the voltage-gated Na<sup>+</sup> channel (Na<sub>v</sub>)<sup>16,17</sup>; Na<sub>v</sub>-mediated currents have not been recorded from freshly-isolated RPE<sup>18,19</sup>. Thus, it is widely thought that the expression of Na<sub>v</sub> in RPE cells is the result of the neuroepithelial differentiation in culture<sup>5,15,20</sup>.

Here, we challenge this conventional wisdom by demonstrating functional Na<sub>v</sub> channels in cultured human embryonic stem cell (hESC) -derived RPE *in vitro* and freshly-isolated mouse RPE *in vivo*. Our work reveals that Na<sub>v</sub> channels in RPE are primarily localized to the tight junctions that connect the cells. We conclude that this specific localization of Na<sub>v</sub>s to cell-cell contacts accounts for previous findings that dissociated RPE cells lack Na<sub>v</sub>-mediated currents. Specifically, we hypothesize that Na<sub>v</sub> channels could co-regulate photoreceptor outer segment (POS) phagocytosis. Our hypothesis is supported by a recent demonstration of the involvement of Na<sub>v</sub> channels in phagocytosis of mycobacteria by macrophages<sup>21</sup>. Our work provides evidence that Na<sub>v</sub>1.8 localizes with the endosomal marker Rab7, and that they both accumulate with the phagosomal particles. Further, Na<sub>v</sub>1.4 co-localizes with connexin 43 (Cx43), a constituent of the gap junctions connecting RPE cells<sup>22</sup>. During phagocytosis, however, they both are localized to the phagosomes with a concomitant decrease in junctional localization. Interestingly, this phagosomal translocation was significantly reduced by selective Na<sub>v</sub> channel blockers. Moreover, the selective blockers combined with the universal Na<sub>v</sub> blocker tetrodotoxin (TTX) reduced the total number of POS particles by up to 34%. More generally, our observations add to the growing body of evidence that Na<sub>v</sub>s play diverse roles in a variety of classically non-excitabile cell types ranging from astrocytes and microglia to macrophages and cancer cells (for review, see<sup>23</sup>).

## Results

### Functional voltage-gated sodium channels are present in RPE monolayer cultures derived from human embryonic stem cells

We used whole-cell recordings from mature hESC-derived RPE in K<sup>+</sup> free extra- and intracellular solutions to observe transient inward currents elicited by a series of depolarizing

voltage pulses after strong hyperpolarization to -170 mV (Fig. 1c, n=33). These recordings were done from an intact monolayer (Fig. 1a) in the presence and absence of a gap-junction antagonist (18 $\alpha$ -glycyrrhetic acid). Similar currents were also identified, albeit infrequently and with reduced amplitudes, in cells from freshly dissociated mature hESC-derived RPE (Fig. 1b, 1d, n=6). In all experiments, the current resembled the Na<sub>v</sub> current characteristic of excitable cells: it had the typical current – voltage relationship (Fig. 1e) and showed fast activation and inactivation (Fig. 1c). The current was activated at about -50 mV and peaked at about -13 mV with a maximum amplitude of  $294 \pm 79$  pA (mean  $\pm$  SEM, n=18). Taking into account the average membrane capacitance  $39 \pm 5$  pF (mean  $\pm$  SEM), the average current density was  $8.7 \pm 3.4$  pA/pF (mean  $\pm$  SEM, n=18). To investigate the time dependency of recovery from inactivation, we used a paired-pulse protocol (Fig. 1f). The current was recorded after a second depolarizing pulse given at increasing time intervals until it finally recovered to its full size (Fig. 1f). The second peak currents were subsequently normalized to the prepulse peak current and plotted against the time between the two voltage pulses (Fig. 1g). Our data was fitted with an exponential function and the best fit yielded to  $\tau = 47$  ms (n=3).

The presence of Na<sub>v</sub> currents was confirmed using the universal extracellular Na<sub>v</sub> channel blocker tetrodotoxin (TTX). Addition of 1  $\mu$ M TTX to the bath reduced the amplitude of the current to roughly one half of that recorded in the control extracellular solution (Fig. 2a). Thus, the recorded current was sensitive to TTX but required reasonably high concentrations. Furthermore, the sensitivity to TTX varied between the cells and in some cases even 10  $\mu$ M TTX was not enough to block the current (Fig. 2a). On the other hand, 2mM QX-314, an intracellular Na<sub>v</sub> channel blocker added to the internal solution of the patch pipette, removed the current rapidly after breaking into the whole-cell configuration (Fig. 2a).

## Voltage-gated sodium channels localize to the apical side of the tight junctions in hESC-derived as well as mouse RPE

Our patch-clamp data indicated that functional Na<sub>v</sub> channels are present in the hESC-derived RPE cells. We also wanted to verify the expression *in situ* and study the precise cellular localization of the channels by performing immunofluorescence studies: the cellular retinaldehyde binding protein (CRALBP), a marker for mature RPE cells<sup>24,25</sup>, was labelled together with the universal Na<sub>v</sub> channel marker. These hESC-derived RPE samples were then imaged with a laser scanning confocal microscope (LSCM) by acquiring 3D image stacks (Fig. 2b) and the data were denoised by deconvolution. This showed that Na<sub>v</sub> was present in fully differentiated RPE. Furthermore, the Na<sub>v</sub> label concentrated primarily on the cellular borders while the CRALBP label was more uniformly localized to the apical side of the hESC-derived RPE (Fig. 2b).

Since the Na<sub>v</sub> label seemed to localize to the cell-cell junctions, immunolabelling was next carried out with the tight junction marker ZO-1. The labels showed highly overlapping distributions, suggesting that Na<sub>v</sub> localizes mostly into the tight junctions (Fig. 2b). The expression of Na<sub>v</sub> channels in RPE has previously been thought to be induced *in vitro* by the cell culturing<sup>18,19</sup>, therefore we wanted to confirm the presence of the Na<sub>v</sub> channels *in vivo* by using freshly isolated and non-cultured mouse RPE (Fig. 2c). The same antibodies gave highly similar labeling distributions in mouse RPE as in hESC-derived RPE: the CRALBP label was cytoplasmic on the apical side of the cells while ZO-1 and Na<sub>v</sub> concentrated on the cell-cell junctions (Fig. 2c).

We investigated the mechanism underlying the disappearance of Na<sub>v</sub> currents from acutely isolated RPE cells (Fig. 1d) and discovered evidence for internalization following destruction of the tight junctions. In dissociated hESC-derived RPE cells seeded for 30 min on glass and immunolabeled with the universal Na<sub>v</sub> marker, CRALPB and ZO-1, the Na<sub>v</sub> label

was primarily concentrated in the narrow region separating the apical and basolateral sides of the cell. ZO-1 and Na<sub>v</sub> formed a clear ring-like structure between the apical and basal membranes following relaxation of junctional tension, suggesting that cytoskeletal contractility is involved in the internalization process (Fig. 2d). Due to the junctional disruption, Na<sub>v</sub>s might not be accessible to pass ionic currents.

### **RPE cells express voltage-gated sodium channel subtypes Na<sub>v</sub>1.4, Na<sub>v</sub>1.5, Na<sub>v</sub>1.6 and Na<sub>v</sub>1.8**

Our previous experiments indicated that functional voltage-gated sodium channels are present in RPE. Since ten different Na<sub>v</sub> channel subtypes have been identified, Na<sub>v</sub>1.1 – Na<sub>v</sub>1.9 and Na<sub>x</sub>, with drastically different expression profiles in diverse cell types, we wanted to investigate which specific channel subtypes are functionally expressed in the RPE cells. At the mRNA level, previous work has shown expression of several Na<sub>v</sub> channels in donated human RPE, specifically Na<sub>v</sub> subtypes 1.2–1.6 and Na<sub>v</sub>1.9<sup>26,27</sup>. We performed immunolabeling experiments with mouse and hESC-derived RPE using specific antibodies against channel subtypes Na<sub>v</sub>1.1 – Na<sub>v</sub>1.9 (Fig. 3a, 3b, Fig. S1). Confocal microscopy showed that Na<sub>v</sub>1.4 localizes as beads-on-a-string to the cell-cell junctions and strongly co-localizes with the gap junction marker connexin 43 (Cx43) (Fig. S3). Na<sub>v</sub>1.8, on the other hand, localized overall to the apical side of the RPE cells (Fig. 3a, 3b). These data indicated that especially the Na<sub>v</sub>1.4 and Na<sub>v</sub>1.8 channels which are usually expressed in skeletal muscle and dorsal root ganglia<sup>28,29</sup>, respectively, are also present in RPE cells. Moreover, subtypes Na<sub>v</sub>1.5 and Na<sub>v</sub>1.6, the predominant channels of cardiac muscle, and the adult central nervous system, respectively<sup>30</sup>, were also identified. However, the expression of Na<sub>v</sub>1.5 was punctate and not detectable in all cells whereas Na<sub>v</sub>1.6 showed a more homogenous labeling pattern and uniform expression between the cells (Fig. 3a, 3b). Subtypes 1.1-1.3, 1.7 and 1.9 were not detected (Fig. S1). Additionally, we investigated

the changes in channel subtype localization patterns during maturation of hESC-derived RPE (Fig. S2). The immunolabeling experiments indicated that the subtypes  $\text{Na}_v1.4$ ,  $\text{Na}_v1.5$  and  $\text{Na}_v1.8$  changed from homogeneous cellular distribution to more specific localization either to cell-cell junctions ( $\text{Na}_v1.4$ ) or to the apical side of the epithelium ( $\text{Na}_v1.5$  and  $\text{Na}_v1.8$ ) during the first 9 days of maturation (Fig. S2).

To verify further the functional expression of the most prominent channel subtypes by electrophysiology, we repeated our patch clamp recordings using highly selective blockers for the channels  $\text{Na}_v1.4$  and  $\text{Na}_v1.8$  and a less specific blocker for  $\text{Na}_v1.6$ . At the time of our study, to our knowledge there was no selective blocker available for  $\text{Na}_v1.5$  without potential cross-reactivity. The average current-voltage relationship (I-V curve) was determined from all these recordings (n=7) (Fig. 3c). The current was sensitive to the combination of 30 nM 4,9-anhydro-TTX ( $\text{Na}_v1.6$  blocker), 1  $\mu\text{M}$  A-803467 ( $\text{Na}_v1.8$  blocker) and 600 nM  $\mu$ -conotoxin GIIB ( $\text{Na}_v1.4$  blocker) (Fig. 3c) and the effect of inhibition was more potent with each blocker thus confirming the expression and functionality of these channel subtypes in the hESC-derived RPE. However, the effect of inhibition was more significant when the blockers were combined with 10 $\mu\text{M}$  TTX (Fig. 3d).

### **Inhibition of voltage-gated sodium channels significantly reduces the number of POS particles in hESC-derived RPE**

Our previous experiments showed that  $\text{Na}_v1.4$ ,  $\text{Na}_v1.5$ ,  $\text{Na}_v1.6$  and  $\text{Na}_v1.8$  are expressed both in mouse and mature hESC-derived RPE. However, their physiological relevance remained unknown. Phagocytosis of POS is one of the major roles of RPE<sup>3</sup>, and a plausible candidate function for the  $\text{Na}_v$  channels, as it requires rapid activation and high synchronization<sup>31</sup>. Thus, next we wanted to investigate the potential importance of  $\text{Na}_v$  channels for POS phagocytosis *in vitro*. Our phagocytosis assays and subsequent labeling with opsin and phalloidin indicated

that the hESC-derived RPE cells have the ability to bind and take up purified POS particles isolated from porcine eyes (Fig. 4a). To study the involvement of  $\text{Na}_v$  channels in this pathway, the assay was repeated in the presence of the highly selective  $\text{Na}_v$  1.4 and 1.8 blockers and TTX. Interestingly, the immunolabeling with opsin and ZO-1, a tight junction protein and cell border marker, showed a reduction in the total number of bound and internalized POS particles (Fig. 4b). To quantify the effect, large fields were imaged from each blocker condition and the number of POS particles was compared with controls. The results showed that the selective blockers caused a 13% ( $\text{Na}_v$  1.4 blocker,  $n=10$ ), 27% ( $\text{Na}_v$  1.8 blocker,  $n=14$ ) or 34% ( $\text{Na}_v$  1.4 and  $\text{Na}_v$  1.8 blockers together with TTX,  $n=18$ ) reduction in the total number of POS particles labeled with opsin (Fig. 4c).

### **Voltage-gated sodium channels $\text{Na}_v1.4$ and $\text{Na}_v1.8$ are involved in POS phagocytosis in mouse RPE *in vivo***

The experiments with pharmacological inhibitors of  $\text{Na}_v$  channel subtypes  $\text{Na}_v1.4$ , and  $\text{Na}_v1.8$  indicated that these channels are involved in POS particle uptake. To investigate further their role in the phagocytosis process *in vivo*, we performed immunolabeling experiments with mouse eyes that had been prepared either at light onset near the diurnal peak of phagocytosis or 10 h after light onset. The role of the channels in POS uptake was studied by comparing the immunolabeling of  $\text{Na}_v1.4$ ,  $\text{Na}_v1.8$  and opsin. At light onset both channels localized to the bound POS particles (Fig. 5a). Since previous experiments had indicated that  $\text{Na}_v1.4$  localized strongly to gap junctions (Fig. S3c), we labeled it together with Cx43 as well as opsin. Co-localization of these three markers was most evident at light onset (Fig. 5b), yet we observed a reduction in  $\text{Na}_v1.4$  and opsin co-localization at 2 h time point (Fig. 5c). Interestingly, after 10 h, when phagocytosis process is over<sup>32</sup>, both  $\text{Na}_v1.4$  and Cx43 stains were again detected at cell-cell junctions (Fig. 5d).



We next wanted to investigate further the role of Na<sub>v</sub>1.8 in the POS phagocytosis. For this purpose, we combined the labeling of Na<sub>v</sub>1.8 with Rab7, a GTPase which is generally recognized in the regulation of vesicle docking and fusion, specifically with late endosomes and lysosomes<sup>33,34</sup>. In macrophages Na<sub>v</sub>1.5 has previously been demonstrated to preferentially localize with Rab7 rather than the endosomal markers early endosome antigen 1 (EEA1) or lysosomal-associated membrane protein 1 (LAMP-1)<sup>35</sup>. To date, controversy persists as to whether Rab7 is additionally involved in the earlier steps of endosomal trafficking<sup>36</sup>. We investigated how Na<sub>v</sub>1.8 labeling correlated with Rab7 and EEA1 as well as the phagocytosis markers MerTK and integrin αβ5 (Fig. S4, Fig. 6). Na<sub>v</sub>1.8 was found to partially co-localize with EEA1 and integrin αβ5, however the distribution similarity was most evident with Rab7 (Fig. S4, Fig 6). Moreover, both Na<sub>v</sub>1.8 and Rab7 also localized with opsin throughout the 2 h follow-up of phagocytosis (Fig. 6a, 6b, Fig. 5a). When the peak of phagocytosis was over (10 h time point), the overall labelling pattern of Na<sub>v</sub>1.8 appeared significantly more homogeneous (Fig. 6c).

The redistribution of Na<sub>v</sub> channels occurring during phagocytosis (Fig. 7a) was studied *ex vivo* with the channel blockers (Fig. 7b). For this purpose, we developed an assay where freshly opened mouse eyecups were incubated in physiological conditions with blocker solutions for 1 h starting at 15 min prior to light onset. The blocker for Na<sub>v</sub>1.4 as well as the combination of all Na<sub>v</sub> blockers significantly prevented the redistribution of Na<sub>v</sub>1.4 compared to the control (Fig. 7b). The inhibition effect was similarly observed in hESC-derived RPE *in vitro* when the POS challenge was carried out with blocker solutions (Fig. 7c). We did not observe significant differences in the labeling pattern of Na<sub>v</sub>1.8 or Rab7 after the blocker incubation. Taken together, these experiments demonstrate the participation of Na<sub>v</sub> channels in the phagocytotic processes of RPE cells *in vitro* and *in vivo*.

## Discussion

Recent studies in diverse cell types have revolutionized our understanding of the roles that Na<sub>v</sub> channels have in cellular functions; no longer are these proteins considered important only in “classically” electrically excitable tissues. Here, we provide the first evidence that Na<sub>v</sub> channels are localized to the tight junctions between the epithelial cells (Fig. 2) and that their activity co-regulates phagocytosis in RPE. Our observations of Na<sub>v</sub> channels and Na<sub>v</sub>-mediated currents in intact RPE preparations (mature hESC-derived RPE monolayers and freshly isolated mouse RPE) demonstrate that previous observations of Na<sub>v</sub>-mediated currents in cultured RPE cells are not preparation-dependent artifacts<sup>19</sup>. Rather, the absence of Na<sub>v</sub>-mediated currents in acutely isolated RPE cells (Fig. 1d) likely results from the destruction of tight junction complexes during dissociation (Fig. 2d). Internalization of Na<sub>v</sub> channels, of course, would result in diminution or absence of membrane currents mediated by these channels as observed by us (Fig. 1d) and others<sup>18</sup>. The observation of Na<sub>v</sub> currents in recordings from hESC-derived RPE monolayers, we believe, is strong evidence that cells in RPE with intact tight junctions usually express functional Na<sub>v</sub>s in their plasma membranes. Unfortunately, the denser and longer apical microvilli in mouse RPE prevented us from performing recordings from intact mouse tissue.

The properties of Na<sub>v</sub>-mediated currents in hESC-derived RPE cells are consistent with observations in other non-neuronal cells. Specifically, the relative insensitivity of the channels to TTX (block by 10 μM TTX) is similar to that of Na<sub>v</sub>s in macrophages<sup>37</sup> and in cultured cancer cells<sup>38</sup>. Additionally, it is consistent with our observation that RPE cells were labeled strongly by an anti-Na<sub>v</sub>1.8 antibody; Na<sub>v</sub>1.8 is the least sensitive of Na<sub>v</sub> channels to TTX<sup>39</sup>. Our pharmacological analysis of Na<sub>v</sub>-mediated currents using Na<sub>v</sub> subtype-specific blockers and immunohistochemical analysis (Fig. 3) provided additional evidence for Na<sub>v</sub>1.8 expression along with lesser expression of Na<sub>v</sub>1.5.

A role for  $\text{Na}_v$  channels in POS phagocytosis is consistent with previous studies showing that  $\text{Na}_v1.5$  and  $\text{Na}_v1.6$  channels enhanced mycobacteria processing in human macrophages and that TTX attenuated phagocytosis in microglia<sup>21,37,40,41</sup>. The mechanisms by which voltage-gated channels with rapid activation and inactivation kinetics regulate phagocytosis are unclear. Although inhibition of  $\text{Na}_v$  channels did not abolish phagocytosis here—the observed 34% attenuation (Fig. 4c) was less dramatic than the previously reported effect of TTX in microglia<sup>42</sup>— $\text{Na}_v$  channel activity clearly modulated phagocytosis as indicated by observations of bound POS particles. Furthermore, the channels could be involved directly in the circadian control of the pathway, as has been recently shown for other ion channels<sup>10</sup>.

Our co-labeling studies give a strong indication that  $\text{Na}_v1.4$  consistently interacts with Cx43 (Fig. 5). Similarly, an interaction between  $\text{Na}_v$  channels and Cx43 has been suggested for  $\text{Na}_v1.5$  in cardiac myocytes (for review, see<sup>43</sup>). Both  $\text{Na}_v1.4$  and Cx43 have previously been implicated in phagocytosis in macrophages, although the findings have been controversial<sup>44,45</sup>. We observed a redistribution of  $\text{Na}_v1.4$  and Cx43 from tight junctions during phagocytosis and for Cx43 the localization with opsin was still evident 2 h after light onset, near the peak expression level of a phagocyte cell surface receptor tyrosine-phosphorylated MerTK<sup>32</sup>. The involvement of  $\text{Na}_v1.4$  was supported by the fact that following  $\text{Na}_v$  blocker incubation, we observed a decrease in its translocation (Fig. 7) with a concurrent reduction in the number of POS particles (Fig. 4c). As with  $\text{Na}_v1.4$  and Cx43,  $\text{Na}_v1.8$  and Rab7 showed consistent co-localization (Fig. 6), and their cellular localization varied throughout phagocytosis during which both also localized with opsin. It is possible that the role of  $\text{Na}_v1.8$  and Rab7 is related to the regulation of endosomal processing or acidification of the endosomal pH, as has been suggested for  $\text{Na}_v1.5$  of macrophages in multiple sclerosis lesions<sup>35</sup>.

The fact that RPE expresses such a versatile array of  $\text{Na}_v$  channels suggests that besides phagocytosis, these channels also have other roles in the physiology of the RPE. Epithelial cells, including RPE, show strong calcium waves in response to mechanical stimulation<sup>46–48</sup>, and it is possible that  $\text{Na}_v$  channels serve to amplify or accelerate voltage changes. Moreover, it is well established that the  $\text{Ca}^{2+}$  binding protein calmodulin (Cam) interacts directly with the C-terminal domain of  $\text{Na}_v$ <sup>49</sup>, and it was recently shown that the  $\text{Ca}^{2+}$ -free form of Cam, ApoCam, enhances the  $\text{Na}_v$  channel opening by several-fold<sup>50</sup>. Thus,  $\text{Na}^+$ - and  $\text{Ca}^{2+}$ -dependent signaling pathways can interact in epithelia as has been reported in the case of astrocytes<sup>51</sup>

In this study, we have demonstrated that  $\text{Na}_v$  channels can be identified in both hESC-derived and mature mouse RPE. This strongly indicates that expression of these channels is not associated with neuroepithelial differentiation nor due to specific culturing conditions. The channels are in fact implicated in POS phagocytosis, one of the key functions of RPE, which is essential for the survival of the retina. Further studies are required to elucidate the additional roles these channels have in the tissue, but it is evident that they are a vital part of the physiology of RPE and may thus contribute to the development of retinal diseases.

## Methods

### Cell culturing

Human ESC lines Regea08/023 and Regea08/017 were cultured as previously described<sup>52</sup>. Briefly, the hESC-derived RPE were spontaneously differentiated in floating cell clusters. The pigmented areas were isolated manually and the cells were dissociated with Tryple Select (1X, ThermoFisher Scientific) and filtered through cell strainer (BD Biosciences, NJ, USA). The isolated cells were then seeded on collagen IV-coated (human placenta, 5  $\mu\text{g}/\text{cm}^2$ ; Sigma-Aldrich, MO, USA) 24-well plates (NUNC, Thermo Fisher Scientific, Tokyo, Japan) for enrichment. Subsequently, the pigmented cells were replated on collagen IV-coated (5  $\mu\text{g}/\text{cm}^2$ )

culture inserts (Millicell Hanging Cell Culture Insert, polyethylene terephthalate, 1.0  $\mu\text{m}$  pore size, EMD Millipore, MA, USA) for maturation. The cells were cultured at 37°C in 5 %  $\text{CO}_2$  in culture medium consisting of: Knock-Out Dulbecco's modified Eagle's medium (KO-DMEM), 15 % Knock-Out serum replacement (KO-SR), 2 mM GlutaMax, 0.1 mM 2-mercaptoethanol (all from Life Technologies, Carlsbad, CA), 1 % Minimum Essential Medium nonessential amino acids, and 50 U/mL penicillin/streptomycin (from Cambrex BioScience, Walkersville, MD). The culture medium was replenished three times a week. Mature monolayers typically showed transepithelial resistance values (TER) of over 200  $\Omega\text{ cm}^2$ .

The National Authority for Medicolegal Affairs Finland approved the study with human embryos (Dnro 1426/32/300/05). The supportive statement from the local ethics committee of the Pirkanmaa hospital district Finland allows us to derive and expand hESC-lines from surplus embryos excluded from infertility treatments and to use the lines for research purposes (R05116). Novel cell lines were not derived in this study

#### Sample preparation

For monolayer patch clamp recordings and immunolabeling, the membrane of the culture insert was removed from the insert holder and cut into smaller pieces. The cells were rinsed three times either with PBS (for immunolabeling) or with Ames' solution (for patch clamp recordings). For the experiments on dissociated cells, the hESC-derived RPE monolayers were treated with TrypLE Select for 10 min in +37 °C, gently mechanically triturated with a pipette and centrifuged for 5 min at 1000 rpm. Dissociated cells were resuspended in culture medium, seeded on glass coverslips coated with poly-L-lysine (Sigma-Aldrich) and allowed to settle down for 10 min for patch clamp recordings and 30 min for immunolabeling.

Mouse RPE was prepared for immunolabeling as follows. C57BL/6 mice were euthanized by  $\text{CO}_2$  inhalation and cervical dislocation in accordance with the ARVO Statement

for the Use of Animals in Ophthalmic and Vision Research and Finland Animal Welfare Act 1986. The eyes were enucleated and bisected along the equator, and the eyecups were sectioned in Ames' solution buffered with 10 mM HEPES and supplemented with 10 mM NaCl, pH was adjusted to 7.4 with NaOH (Sigma-Aldrich). The retina was gently removed from the eyecup leaving the RPE firmly attached to the eyecup preparation.

### Patch clamp recordings

Ionic currents were recorded from mature hESC-derived RPE monolayers or freshly dissociated cells using the standard patch-clamp technique in whole-cell configuration. Patch pipettes (resistance 5-6 M $\Omega$ ) were filled with an internal solution containing (in mM) 83 CsCH<sub>3</sub>SO<sub>3</sub>, 25 CsCl, 10 TEA-Cl, 5.5 EGTA, 0.5 CaCl<sub>2</sub>, 4 ATP-Mg, 0.1 GTP-Na, 10 HEPES, and 5 NaCl; pH was adjusted to ~7.2 with CsOH and osmolarity was ~ 290 mOsm (Gonotec, Osmomat 030, Labo Line Oy, Helsinki, Finland). In some experiments, the internal solution also contained 2 mM QX-314-Cl (from Sigma-Aldrich). During all recordings, the tissue was perfused at 2.5 ml min<sup>-1</sup> with Ames' solution (Sigma-Aldrich) buffered with 10 mM HEPES and supplemented with 10 mM NaCl and 5 mM TEA-Cl. The pH was adjusted to 7.4 with NaOH and the osmolarity set to ~ 305 mOsm. The bath solution contained 10 nM-10  $\mu$ M Tetrodotoxin (TTX) citrate (from Tocris Bioscience) when the effect of TTX on the recorded currents was investigated, and 30  $\mu$ M 18 $\alpha$ -glycyrrhetic acid (from Sigma-Aldrich) when the effect of gap junctional coupling was tested. For the channel subtype recordings, the bath solution was supplemented with 30 nM 4,9-AnhydroTTX, 1  $\mu$ M A-803467, or 600 nM  $\mu$ -Conotoxin GIIIB. All recordings were made in voltage-clamp mode with pClamp 10.2 software using the Axopatch 200B patch-clamp amplifier connected to an acquisition computer via AD/DA Digidata 1440 (Molecular devices, USA). The access resistance was below 30 M $\Omega$

and the membrane resistance above 150 M $\Omega$ . Series resistance was 15-30 M $\Omega$  and was not compensated. Holding potentials were corrected for a 3 mV liquid junction potential during the data analysis. All recordings were performed at room temperature.

## Immunolabeling

Prior to immunolabeling, samples were washed three times with PBS and fixed for 15 min with 4% paraformaldehyde (pH 7.4; Sigma-Aldrich). After repeated washes with PBS, samples were permeabilized by incubating in 0.1% Triton X-100 in PBS (Sigma-Aldrich) for 15 min and subsequently blocked with 3% BSA (BSA; Sigma-Aldrich) for 1 h. All immunolabeling incubations were done at room temperature.

Primary antibodies against the following proteins were used in this study: cellular retinaldehyde-binding protein (CRALBP) 1:400 (ab15051, Abcam), Connexin 43 (Cx43) 1:200 (C6219, Sigma-Aldrich), N-Cadherin 1:200 (C2542), Nav1.1 1:200 (ASC-001, Alomone labs), Nav1.2 1:200 (ab99044, Abcam), Nav1.3 1:200 (ASC-004, Alomone labs), Nav1.4 1:200 (ASC-020, Alomone labs), Nav1.5 1:200 (AGP-008, Alomone labs), Nav1.6 1:200 (ab65166, Abcam), Nav1.7 1:200 (ASC-008, Alomone labs), Nav1.8 (AGP-029, Alomone labs), Nav1.9 1:200 (AGP-030, Alomone labs), Pan Nav (Nav) 1:200 (ASC-003, Alomone labs), Rab7 1:50 (ab50533, Abcam), Zonula occludens-1 (ZO-1) 1:50 (33-9100, Life Technologies). All primary antibodies were diluted in 3% BSA in PBS and incubated for 1 h.

The incubation with primary antibodies was followed by three PBS washes and 1 h incubation with secondary antibodies; goat anti-rabbit Alexa Fluor 568, donkey anti-rabbit Alexa Fluor 488, donkey anti-mouse Alexa Fluor 568, donkey anti-mouse Alexa Fluor 488, goat anti-guinea pig Alexa Fluor 568, goat anti-mouse Alexa Fluor 488, donkey anti-rabbit Alexa 647, donkey anti-mouse Alexa 647, goat anti-guinea pig Alexa Fluor 647 and goat anti-

mouse Alexa Fluor 405 (all from Molecular Probes, Thermo Fisher Scientific) diluted 1:200 in 3% BSA in PBS. Actin was visualized using either a direct phalloidin Alexa Fluor 647 conjugate 1:50 (A22287, Thermo Fisher Scientific), Atto-633 1:50 (68825, Sigma-Aldrich) or tetramethylrhodamine B conjugate 1:400 (P1951, Sigma-Aldrich) and the nuclei were stained with 4', 6'-diamidino-2-phenylidole (DAPI) included in the mounting medium (P36935, Thermo Fisher Scientific). When primary antibodies from the same host were co-labeled, one was directly conjugated to fluorophore 488 using the APEX conjugation kit (A10468, Thermo Fisher Scientific).

#### Phagocytosis assay for hESC-derived and mouse RPE

The porcine POS particles were isolated and purified as previously described<sup>52,53</sup>. Briefly, the eyecups obtained from a slaughterhouse were opened and retinas were removed using forceps under dim red light. The retinas were shaken gently in 0.73 M sucrose phosphate buffer and separated after filtering in sucrose gradient using an ultracentrifuge (Optima ultracentrifuge, Beckman Coulter, Inc., Brea, CA) at 112,400 x g for 1 h at 4°C. The collected POS layer was centrifuged 3000 x g for 10 min, +4°C and stored in 73 mM sucrose phosphate buffer at -80°C.

The purified POS particles were fed to the hESC-derived cells in a KO-DMEM medium supplemented with 10% fetal bovine serum (FBS) and incubated for 2 h at 37° in 5 % CO<sup>2</sup>. In the blockers experiments, selective blockers for Nav1.4, Nav1.6 and Nav1.8 and TTX were also added to the medium for the incubation. Then the monolayers were washed twice briefly with PBS and fixed with PFA according to the immunostaining protocol. Phagocytosis was studied *in vivo* by preparing the mouse eyes under dim red light either at light onset or 15 min, 2 h and 10 h after it. The mice were reared in normal 12-hour light/dark cycle. When blockers were used, the eyecup was opened and then incubated in blocker solutions diluted in Ames' as described above, for 1 h at 37° with the retina left intact.



### Quantification of bound POS particles in hESC-derived RPE

To detect and quantify bound POS particles, large random fields were imaged with Zeiss LSM780 LSCM on inverted Zeiss Cell Observer microscope (Zeiss, Jena, Germany) by using Plan-Apochromat 63x/1.4 oil immersion objective with 2.0 zoom. The images were first blurred with a Gaussian function after which a Z-maximum intensity projection was binarized using a global threshold. The number of POS particles was then analyzed from the images converted to mask.

### Statistical analysis of the POS phagocytosis quantification

Phagocytosis was repeated three times and the images were pooled together. The normality of the data was tested by using Shapiro–Wilk normality test. Finally, pair-wise comparison was conducted by using two-sided Student’s T-test to confirm the possible statistical significance between the experimental conditions.

### Confocal microscopy and image processing

Confocal microscopy was performed with Zeiss LSM780 LSCM on inverted Zeiss Cell Observer microscope (Zeiss, Jena, Germany) by using Plan-Apochromat 63x/1.4 oil immersion objective. Voxel size was set to  $x=y=66\text{nm}$  and  $z=200\text{nm}$  and 1024x1024 pixel stacks of 70-120 slices were acquired with line average of 2. The Alexa Fluor 405 was excited with 405 nm diode laser; Alexa Fluor 488 with 488nm laserline from Argon laser; Alexa Fluor 568 and TRITC with 561nm DPSS or 562nm *InTune* laser; Atto 633 and Alexa Fluor 647 with 633 nm HeNe and 628nm *InTune* laser. Emission was detected with windows of (in nm): 410 – 495 (DAPI, Alexa Fluor 405), 499 – 579 (Alexa Fluor 488), 579 – 642 (Alexa Fluor 568) and 642

– 755 (Alexa Fluor 647). Laser powers were minimized to avoid bleaching and photomultiplier tube sensitivities were adjusted to obtain optimal signal-to-noise ratio of the signal. The data was saved in .czi format and deconvolved using Huygens Essential (SVI, Hilversum, Netherlands) software. The deconvolution was performed with theoretical PSF, signal-to-noise ratio of 5 and quality threshold of 0.01. Information regarding the refractive index of the mounting media was provided by the manufacturer (Vector Laboratories, Burlingame, USA). Images were further processed with ImageJ<sup>54</sup> and only linear brightness and contrast adjustments were performed for the pixel intensities. Final figures were assembled using Adobe Photoshop CS6 (Adobe Systems, San Jose, USA).

## References

1. Bok, D. The retinal pigment epithelium: a versatile partner in vision. *J. Cell Sci. Suppl.* **17**, 189–95 (1993).
2. Steinberg, R. H. Interactions between the retinal pigment epithelium and the neural retina. *Doc. Ophthalmol.* **60**, 327–46 (1985).
3. Strauss, O. The retinal pigment epithelium in visual function. *Physiol. Rev.* **85**, 845–81 (2005).
4. Takei, Y. & Ozanics, V. Origin and development of Bruch's membrane in monkey fetuses: an electron microscopic study. *Invest. Ophthalmol.* **14**, 903–16 (1975).
5. Wimmers, S., Karl, M. O. & Strauss, O. Ion channels in the RPE. *Prog. Retin. Eye Res.* **26**, 263–301 (2007).
6. Young, R. W. & Bok, D. Participation of the retinal pigment epithelium in the rod outer segment renewal process. *J. Cell Biol.* **42**, 392–403 (1969).
7. Young, R. W. The daily rhythm of shedding and degradation of rod and cone outer segment membranes in the chick retina. *Invest. Ophthalmol. Vis. Sci.* **17**, 105–16

- (1978).
8. LaVail, M. M. Circadian nature of rod outer segment disc shedding in the rat. *Invest. Ophthalmol. Vis. Sci.* **19**, 407–11 (1980).
  9. Kevany, B. M. & Palczewski, K. Phagocytosis of retinal rod and cone photoreceptors. *Physiology (Bethesda)*. **25**, 8–15 (2010). doi:10.1152/physiol.00038.2009.
  10. Müller, C., Gómez, N. M., Ruth, P. & Strauß, O. CaV1.3 L-type channels, maxiK Ca(2+)-dependent K(+) channels and bestrophin-1 regulate rhythmic photoreceptor outer segment phagocytosis by retinal pigment epithelial cells. *Cell Signal*. **26**, 968–78 (2014). doi:10.1016/j.cellsig.2013.12.021.
  11. Fox, J. A., Pfeffer, B. A. & Fain, G. L. Single-channel recordings from cultured human retinal pigment epithelial cells. *J. Gen. Physiol.* **91**, 193–222 (1988).
  12. Botchkin, L. M. & Matthews, G. Chloride current activated by swelling in retinal pigment epithelium cells. *Am. J. Physiol.* **265**, C1037-45 (1993).
  13. Fox, J. A. & Steinberg, R. H. Voltage-dependent currents in isolated cells of the turtle retinal pigment epithelium. *Pflugers Arch.* **420**, 451–60 (1992).
  14. Ueda, Y. & Steinberg, R. H. Voltage-operated calcium channels in fresh and cultured rat retinal pigment epithelial cells. *Invest. Ophthalmol. Vis. Sci.* **34**, 3408–18 (1993).
  15. Reichhart, N. & Strauß, O. Ion channels and transporters of the retinal pigment epithelium. *Exp. Eye Res.* **126**, 27–37 (2014). doi: 10.1016/j.exer.2014.05.005.
  16. Kokkinaki, M., Sahibzada, N. & Golestaneh, N. Human induced pluripotent stem-derived retinal pigment epithelium (RPE) cells exhibit ion transport, membrane potential, polarized vascular endothelial growth factor secretion, and gene expression pattern similar to native RPE. *Stem Cells* **29**, 825–35 (2011). doi: 10.1002/stem.635.
  17. Sakai, H. & Saito, T. Na<sup>+</sup> and Ca<sup>2+</sup> channel expression in cultured newt retinal pigment epithelial cells: comparison with neuronal types of ion channels. *J. Neurobiol.*

- 32**, 377–90 (1997).
18. Botchkin, L. M. & Matthews, G. Voltage-dependent sodium channels develop in rat retinal pigment epithelium cells in culture. *Proc. Natl. Acad. Sci. U. S. A.* **91**, 4564–8 (1994).
  19. Wen, R., Lui, G. M. & Steinberg, R. H. Expression of a tetrodotoxin-sensitive Na<sup>+</sup> current in cultured human retinal pigment epithelial cells. *J. Physiol.* **476**, 187–196 (1994).
  20. Miyagishima, K. J. *et al.* In Pursuit of Authenticity: Induced Pluripotent Stem Cell-Derived Retinal Pigment Epithelium for Clinical Applications. *Stem Cells Transl. Med.* **5**, 1562–74 (2016). doi:10.5966/sctm.2016-0037.
  21. Carrithers, L. M., Hulseberg, P., Sandor, M. & Carrithers, M. D. The human macrophage sodium channel NaV1.5 regulates mycobacteria processing through organelle polarization and localized calcium oscillations. *FEMS Immunol. Med. Microbiol.* **63**, 319–27 (2011). doi: 10.1111/j.1574-695X.2011.00853.x.
  22. Janssen-Bienhold, U., Dermietzel, R. & Weiler, R. Distribution of connexin43 immunoreactivity in the retinas of different vertebrates. *J. Comp. Neurol.* **396**, 310–321 (1998).
  23. Black, J. A. & Waxman, S. G. Noncanonical roles of voltage-gated sodium channels. *Neuron* **80**, 280–91 (2013). doi: 10.1016/j.neuron.2013.09.012.
  24. Bunt-Milam, A. H. & Saari, J. C. Immunocytochemical localization of two retinoid-binding proteins in vertebrate retina. *J. Cell Biol.* **97**, 703–12 (1983).
  25. Crabb, J. W. *et al.* Structural and functional characterization of recombinant human cellular retinaldehyde-binding protein. *Protein Sci.* 7746–757 (1998).
  26. Booij, J. C. *et al.* A New Strategy to Identify and Annotate Human RPE-Specific Gene Expression. *PLoS One* **5**, e9341 (2010). doi: 10.1371/journal.pone.0009341.

27. Whitmore, S. S. *et al.* Transcriptomic analysis across nasal, temporal, and macular regions of human neural retina and RPE/choroid by RNA-Seq. *Exp. Eye Res.* **129**, 93–106 (2014).
28. Bao, L. Trafficking regulates the subcellular distribution of voltage-gated sodium channels in primary sensory neurons. *Mol. Pain* **11**, 61 (2015). doi: 10.1186/s12990-015-0065-7.
29. Ptáček, L. J. *et al.* Identification of a mutation in the gene causing hyperkalemic periodic paralysis. *Cell* **67**, 1021–1027 (1991).
30. Goldin, A. L. Diversity of Mammalian Voltage-Gated Sodium Channels. *Ann. N. Y. Acad. Sci.* **868**, 38–50 (1999).
31. Mazzoni, F., Safa, H. & Finnemann, S. C. Understanding photoreceptor outer segment phagocytosis: use and utility of RPE cells in culture. *Exp. Eye Res.* **126**, 51–60 (2014). doi: 10.1016/j.exer.2014.01.010.
32. Nandrot, E. F. *et al.* Loss of synchronized retinal phagocytosis and age-related blindness in mice lacking alphavbeta5 integrin. *J. Exp. Med.* **200**, 1539–45 (2004).
33. Gordiyenko, N. V, Fariss, R. N., Zhi, C. & MacDonald, I. M. Silencing of the CHM gene alters phagocytic and secretory pathways in the retinal pigment epithelium. *Invest. Ophthalmol. Vis. Sci.* **51**, 1143–50 (2010). doi: 10.1167/iovs.09-4117.
34. Kinchen, J. M. & Ravichandran, K. S. Phagosome maturation: going through the acid test. *Nat. Rev. Mol. Cell Biol.* **9**, 781–95 (2008). doi: 10.1038/nrm2515.
35. Black, J. A., Newcombe, J. & Waxman, S. G. Nav1.5 sodium channels in macrophages in multiple sclerosis lesions. *Mult. Scler.* **19**, 532–42 (2013). doi: 10.1177/1352458512460417.
36. Girard, E. *et al.* Rab7 is functionally required for selective cargo sorting at the early endosome. *Traffic* **15**, 309–26 (2014). doi: 10.1111/tra.12143.

37. Carrithers, M. D. *et al.* Expression of the Voltage-Gated Sodium Channel NaV1.5 in the Macrophage Late Endosome Regulates Endosomal Acidification. *J. Immunol.* **178**, 7822–32 (2007).
38. Roger, S., Gillet, L., Le Guennec, J. Y. & Besson, P. Voltage-gated sodium channels and cancer: is excitability their primary role? *Front. Pharmacol.* **6**, 152 (2015). doi: 10.3389/fphar.2015.00152.
39. Catterall, W. A., Goldin, A. L., Waxman, S. G. & International Union of Pharmacology. International Union of Pharmacology. XXXIX. Compendium of voltage-gated ion channels: sodium channels. *Pharmacol. Rev.* **55**, 575–8 (2003).
40. Craner, M. J. *et al.* Sodium channels contribute to microglia/macrophage activation and function in EAE and MS. *Glia* **49**, 220–9 (2005).
41. Carrithers, M. D. *et al.* Regulation of podosome formation in macrophages by a splice variant of the sodium channel SCN8A. *J. Biol. Chem.* **284**, 8114–26 (2009). doi: 10.1074/jbc.M801892200.
42. Black, J. A., Liu, S. & Waxman, S. G. Sodium channel activity modulates multiple functions in microglia. *Glia* **57**, 1072–1081 (2009). doi: 10.1002/glia.20830.
43. Veeraraghavan, R., Gourdie, R. G. & Poelzing, S. Mechanisms of cardiac conduction: a history of revisions. *Am. J. Physiol. Hear. Circ. Physiol.* **306**, H619-27 (2014). doi: 10.1152/ajpheart.00760.2013.
44. Anand, R. J. *et al.* A role for connexin43 in macrophage phagocytosis and host survival after bacterial peritoneal infection. *J. Immunol.* **181**, 8534–43 (2008).
45. Glass, A. M., Wolf, B. J., Schneider, K. M., Princiotta, M. F. & Taffet, S. M. Connexin43 is dispensable for phagocytosis. *J. Immunol.* **190**, 4830–5 (2013). doi: 10.4049/jimmunol.
46. Abu Khamidakh, A. E., Juuti-Uusitalo, K., Larsson, K., Skottman, H. & Hyttinen, J.

- Intercellular Ca(2+) wave propagation in human retinal pigment epithelium cells induced by mechanical stimulation. *Exp. Eye Res.* **108**, 129–139 (2013). doi: 10.1016/j.exer.2013.01.009.
47. Churchill, G. C., Atkinson, M. M. & Louis, C. F. Mechanical stimulation initiates cell-to-cell calcium signaling in ovine lens epithelial cells. *J. Cell Sci.* 355–65 (1996).
  48. Stalmans, P. & Himpens, B. A decreased Ca<sup>2+</sup>-wave propagation is found among cultured RPE cells from dystrophic RCS rats. *Invest. Ophthalmol. Vis. Sci.* **39**, 1493–502 (1998).
  49. Wang, C. *et al.* Structural analyses of Ca<sup>2+</sup>/CaM interaction with NaV channel C-termini reveal mechanisms of calcium-dependent regulation. *Nat. Commun.* **5**, 4896 (2014). doi: 10.1038/ncomms5896.
  50. Adams, P. J. *et al.* Apocalmodulin Itself Promotes Ion Channel Opening and Ca(2+) Regulation. *Cell* **159**, 608–622 (2014). doi: 10.1016/j.cell.2014.09.047.
  51. Langer, J., Stephan, J., Theis, M. & Rose, C. R. Gap junctions mediate intercellular spread of sodium between hippocampal astrocytes in situ. *Glia* **60**, 239–52 (2012). doi: 10.1002/glia.21259
  52. Vaajasaari, H. *et al.* Toward the defined and xeno-free differentiation of functional human pluripotent stem cell-derived retinal pigment epithelial cells. *Mol. Vis.* **17**, 558–75 (2011).
  53. Mao, Y. & Finnemann, S. C. Analysis of photoreceptor outer segment phagocytosis by RPE cells in culture. *Methods Mol. Biol.* **935**, 285–95 (2013). doi: 10.1007/978-1-62703-080-9\_20.
  54. Schneider, C. A., Rasband, W. S. & Eliceiri, K. W. NIH Image to ImageJ: 25 years of image analysis. *Nat. Methods* **9**, 671–5 (2012).

## **Acknowledgements**

We would like to acknowledge the following contributors. We are grateful to Dr. Jari Hyttinen (Tampere University of Technology) for resources and support. We thank Drs. Kristian Donner (University of Helsinki) and Joshua Singer (University of Maryland) for valuable comments on the manuscript. We acknowledge Outi Heikkilä (Tampere University of Technology), Outi Melin and Hanna Pekkanen (University of Tampere) for technical assistance and Hannele Uusitalo-Järvinen (University of Tampere) as well as Petri Ala-Laurila Lab (University of Helsinki) for providing the animal tissue. University of Tampere Imaging Facility is gratefully acknowledged. This work was supported by the Academy of Finland Grants 260375 (S.N.), 287287 (S.N.), 294054 (S.N.), 267471 (T.O.I.), by the Emil Aaltonen Foundation and by Päivikki and Sakari Sohlberg Foundation.

## **Contributions**

Conception and design of the study as well as data acquisition, analysis and interpretation was performed by J.K.J, T.O.I., and S.N. The expertise on human embryonic stem cells and RPE differentiation was provided by H.S. The article was written and revised by J.K.J, T.O.I., H.S., and S.N.

## **Competing financial interests**

Authors declare no financial interests

## **Materials and correspondence**

Correspondence to Soile Nymark



## Figure legends

### Figure 1 | Patch clamp recordings of Na<sup>+</sup> currents from hESC-derived RPE in different cell morphologies.

Brightfield light microscopy images of hESC-derived RPE cells. (a) Mature hESC-derived RPE grown on insert for 2 months showing strongly pigmented cells and characteristic epithelial morphology. (b) Mature hESC-derived RPE was dissociated yielding single cells with typical morphology showing pigmented apical and non-pigmented basal sides. The cells were seeded on poly-L-lysine coated glass coverslip and let to adhere for 10 min before recording. Whole-cell patch clamp recordings as responses to a series of depolarizing voltage pulses (-80 to +60 mV) after strong hyperpolarization either (c) from mature monolayer of hESC-derived RPE or (d) from single hESC-derived RPE cells. Patch clamp pipette is visible in the middle of the images. Scale bars 10  $\mu$ m. (e-g) Analysis of the monolayer recordings. (e) The average normalized peak current – voltage relationship ( $I/I_{\max}$  vs  $V_m$ , n=33). Data points indicate mean $\pm$ SEM. (f-g) The time dependency of recovery from inactivation. The second peak currents were normalized and plotted against the voltage pulse interval (10-270 ms). The best fit to an exponential function was obtained with  $\tau = 47$  ms (n=3).

### Figure 2 | Blocker sensitivity and distribution of Na<sub>v</sub> channels.

Patch clamp recordings were performed on mature hESC-derived RPE monolayers. (a) Applying TTX extracellularly (either 10  $\mu$ M or 1  $\mu$ M) did not entirely block the current (left). The current was completely removed by intracellular QX-314 (2mM) (right). Laser scanning confocal microscopy (LSCM) images on Na<sub>v</sub> distribution in RPE cells showing different imaging planes of the confocal data. LSCM data Z-maximum intensity projections (Z-MIP) of

(b) hESC-derived and (c) mouse RPE stained against Na<sub>v</sub> channels (green) and RPE marker CRALBP (red) (left) or tight junction marker ZO-1 (red) (right), together with cross-sectional X-MIPs from the highlighted regions. (d) Dissociated hESC-derived RPE cells were let to adhere to poly-l-lysine coated coverslips for 30 min, fixed and immunolabeled against Na<sub>v</sub> together with RPE marker protein CRALBP (up) or tight junction marker ZO-1 (down). The Na<sub>v</sub> label concentrated on the belt-like region in the middle of the cell, between the basal and apical sides. Scale bars 5 μm.

**Figure 3 | Immunolabeling of different Na<sub>v</sub> subtypes in hESC- and mouse derived RPE, and patch clamp recordings with selective Na<sub>v</sub> blockers.**

The specific pattern of Na<sub>v</sub> subtypes was studied by immunolabeling. (a) Laser scanning confocal microscopy Z-maximum intensity projections of mature hESC-derived or (b) mouse RPE. Na<sub>v</sub> subtypes 1.4-1.6 and 1.8 (green) were immunolabeled together with filamentous actin (phalloidin stain, red). Patch clamp recordings were performed on mature hESC-derived RPE using selective blockers for channel subtypes. (c) Na<sub>v</sub> subtypes were sequentially blocked by extracellularly applied 4,9-AnhydroTTX (30 nM, Na<sub>v</sub>1.6 blocker) in combination with A-803467 (1 μM, Na<sub>v</sub>1.8 blocker) and μ-Conotoxin GIIB (600 nM, Na<sub>v</sub>1.4 blocker). The average normalized peak current – voltage relationship ( $I/I_{\max}$  vs  $V_m$ ) was determined from all recordings (n=7). (d) Applying the selective blockers in combination with TTX (10 μM) removed most of the Na<sub>v</sub> current. Scale bars 10 μm.

**Figure 4 | POS phagocytosis assay of hESC-derived RPE with selective Na<sub>v</sub> blockers.**

POS phagocytosis assay was performed on mature hESC-derived RPE by incubating the monolayers with purified porcine POS particles. (a) Laser scanning confocal microscopy (LSCM) Z-maximum intensity projections (Z-MIP) of the POS particles (green) with

filamentous actin staining (red) after 2h of phagocytic challenge. **(b)** LSCM Z-MIP images of ZO-1 (grey) together with opsin (green). The assay with selective  $\text{Na}_v$  blocker combination reduced the total number of POS particles. Scale bars 20  $\mu\text{m}$ . **(c)** Quantification of control (n=15) and blocker samples showed a 13% ( $\text{Na}_v1.4$  blocker, n= 10), 27% ( $\text{Na}_v1.8$  blocker, n=14) or 34% ( $\text{Na}_v1.4$  and  $\text{Na}_v1.8$  blockers with TTX, n=18) reduction in the number of POS particles labeled with opsin. Center lines show the medians; box limits indicate the 25th and 75th percentiles as determined by R software; whiskers extend to minimum and maximum values.

### **Figure 5 | POS phagocytosis *in vivo* and the roles of $\text{Na}_v1.4$ and Cx43.**

Phagocytosis was studied *in vivo* by dissecting mouse eyes at various time points during the circadian cycle. Filamentous actin was stained with phalloidin (gray in the merged image) to highlight epithelial cell-cell junctions and lower panels show a high contrast blow up of selected regions. Laser scanning confocal microscopy Z-maximum intensity projections of mouse RPE prepared at light onset showed a localization of opsin labeled POS particles (blue) and  $\text{Na}_v1.4$  (green) together with **(a)**  $\text{Na}_v1.8$  (red) or **(b)** Cx43 (red). **(c)** 2 h after the light onset, labeling of both  $\text{Na}_v1.4$  (green) and Cx43 (red) in the cell-cell junctions was dramatically reduced and Cx43 localized with POS particles. **(d)** 10 h after the light onset,  $\text{Na}_v1.4$  (green) and Cx43 (red) both localize to cell-cell junctions. Scale bars 10  $\mu\text{m}$ .

### **Figure 6 | POS phagocytosis *in vivo* and the roles of $\text{Na}_v1.8$ and Rab7.**

The role of  $\text{Na}_v1.8$  and its interaction with endosomal marker Rab7 was studied by dissecting mouse eyes at various time points during the circadian cycle. Filamentous actin was stained with phalloidin (gray in the merged image) to highlight epithelial cell-cell junctions and lower panels show a high contrast blow up of selected regions. Laser scanning confocal microscopy Z-maximum intensity projections of mouse RPE prepared **(a)** at 15 min after the light onset

indicated clustering of Rab7 (red) and Na<sub>v</sub>1.8 (green) together with opsin (blue) labeled POS particles. **(b)** 2 h after the light onset, Na<sub>v</sub>1.8 (green) and Rab7 (red) still co-localize with POS particles but start to show more homogeneous localization pattern. **(c)** 10 h after light onset a diffuse labeling was shown for both and Rab7 (red) and Na<sub>v</sub> 1.8 (green). Scale bars 10 μm.

### **Figure 7 | Redistribution of Na<sub>v</sub>1.4 during POS phagocytosis.**

The redistribution of Na<sub>v</sub>1.4 during phagocytosis and the effect of Na<sub>v</sub> blockers was studied in mouse and hESC-derived RPE. Filamentous actin was stained with phalloidin (red) to highlight epithelial cell-cell junctions. Laser scanning confocal microscopy Z-maximum intensity projections of **(a)** Na<sub>v</sub>1.4 localization at light onset and 2 h after showed disappearance of the beads-on-a-string type labeling from cell-cell junctions. Different assays were used to investigate Na<sub>v</sub>1.4 distribution during phagocytosis and the effect of selective blockers for Na<sub>v</sub>1.4 and Na<sub>v</sub>1.8 in combination with TTX (Na<sub>v</sub> blockers), or only of the selective blocker for Na<sub>v</sub>1.4. **(b)** The redistribution of Na<sub>v</sub>1.4 was studied *ex vivo* by incubating opened eyecups in control solution or with the selective blockers. In both of the blocker samples, the redistribution was inhibited and the beads-on-a-string type labeling remained visible (highlighted by arrows) in the cell-cell junctions. **(c)** The hESC-derived RPE phagocytosis assay showed a highly similar redistribution of Na<sub>v</sub>1.4 and the blockers had the same effect *in vitro*. Scale bars 10 μm.

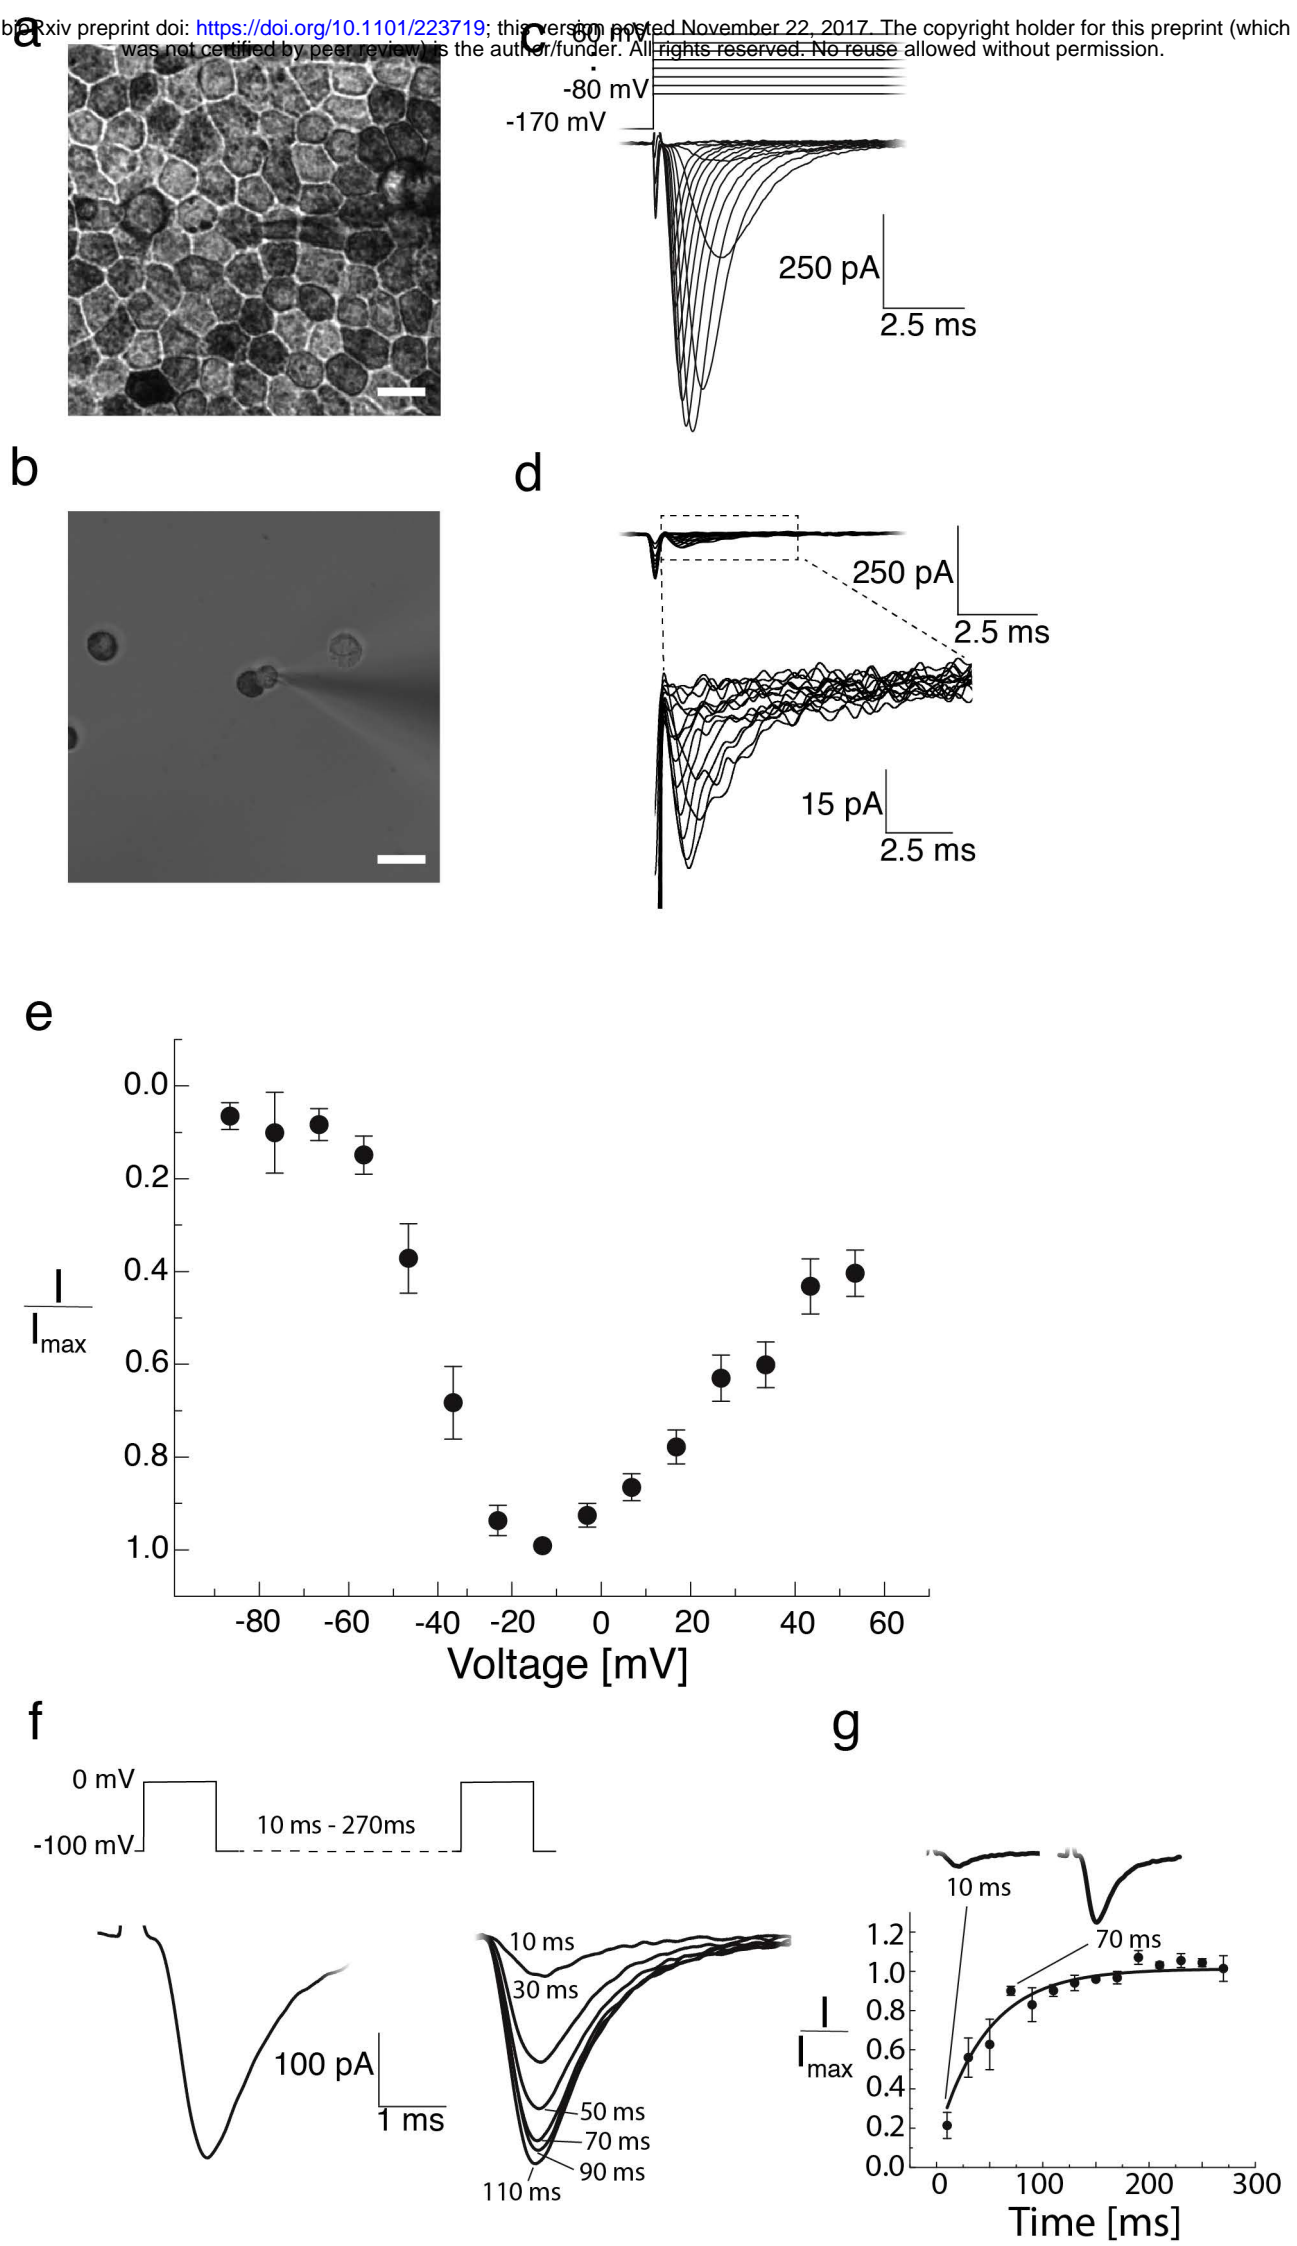



**a**

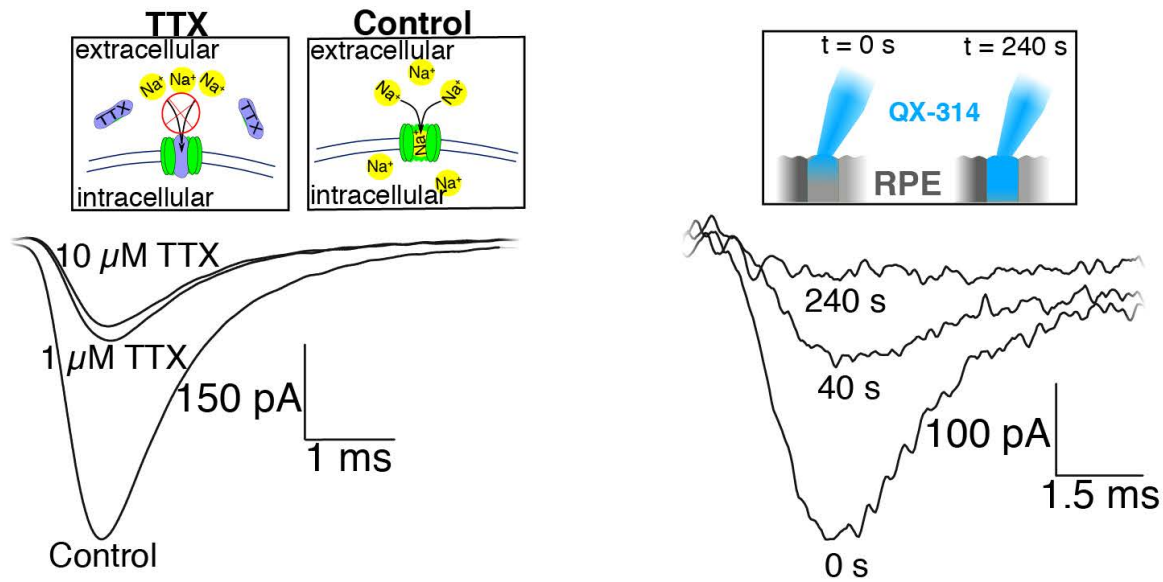

**b**

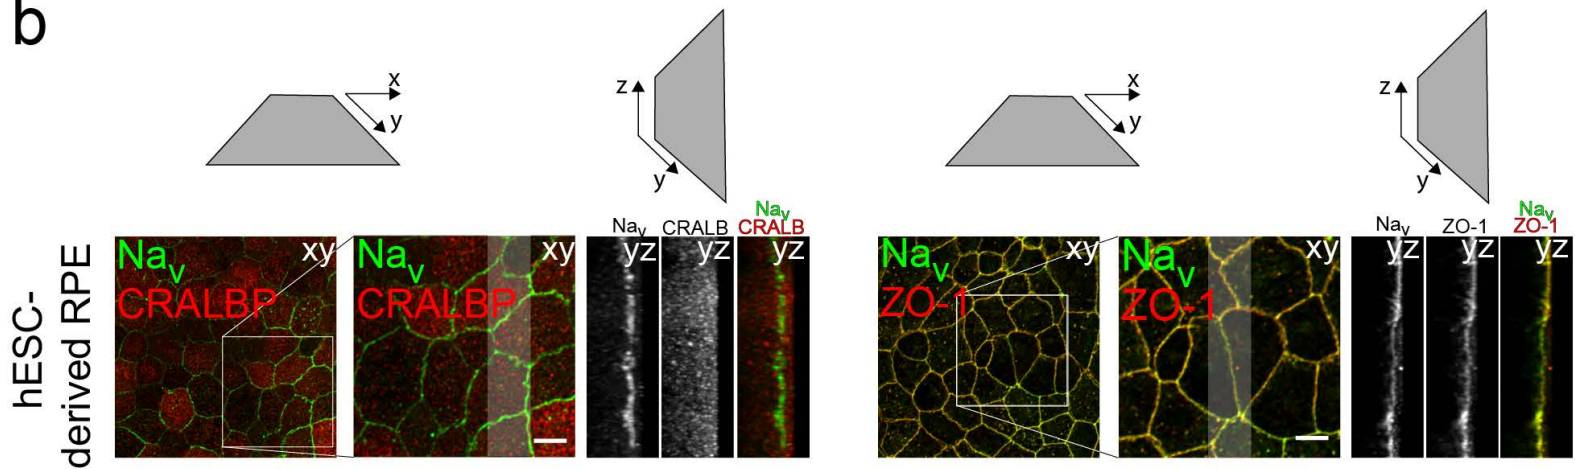

**c**

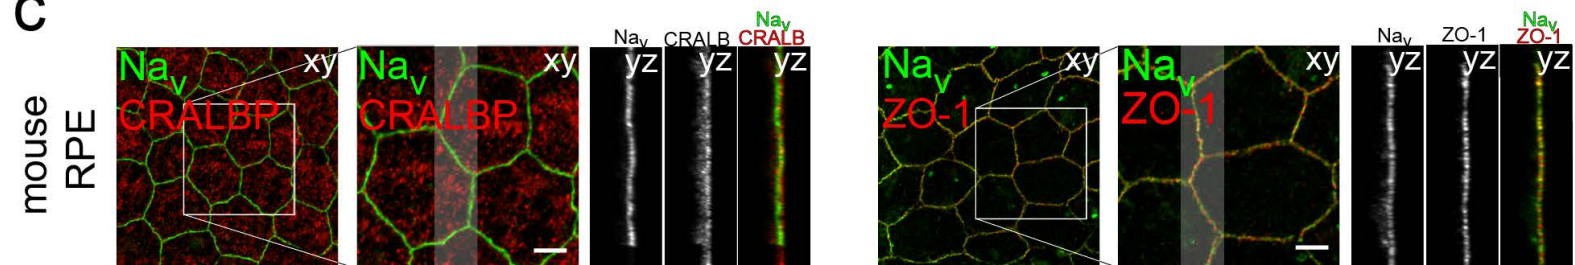

**d**

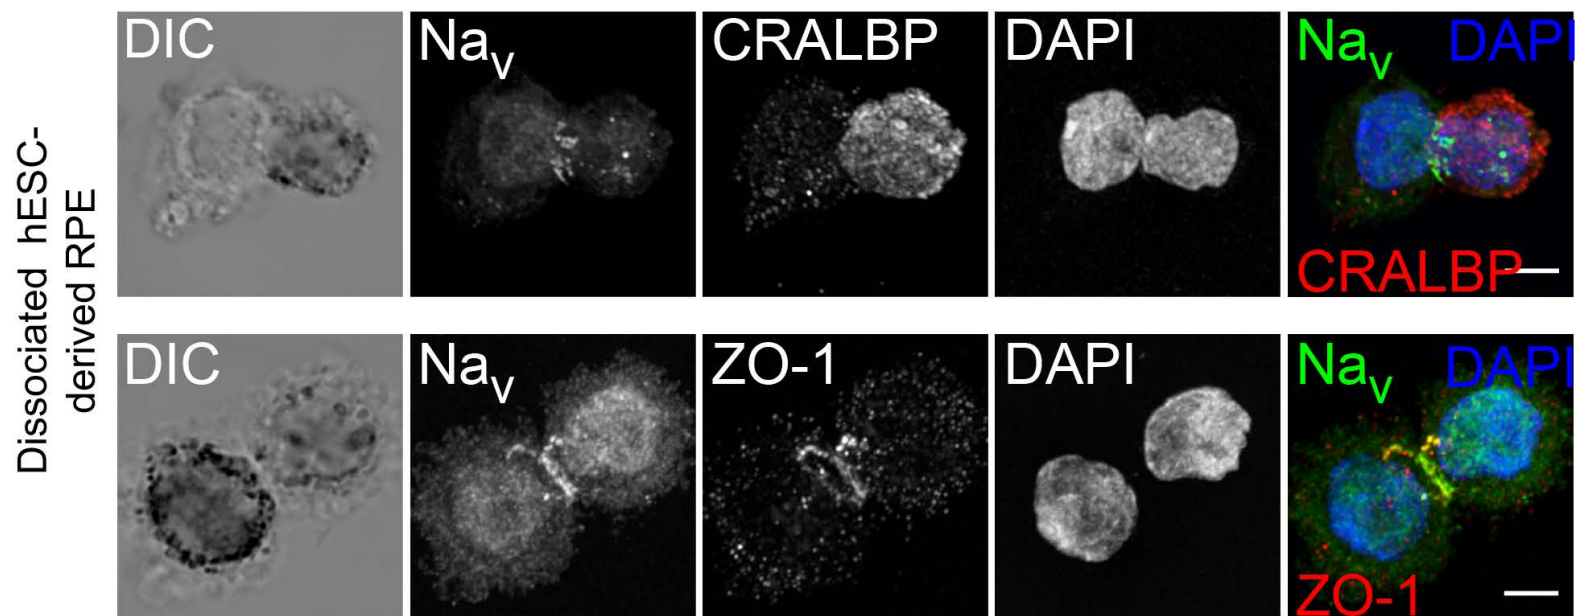



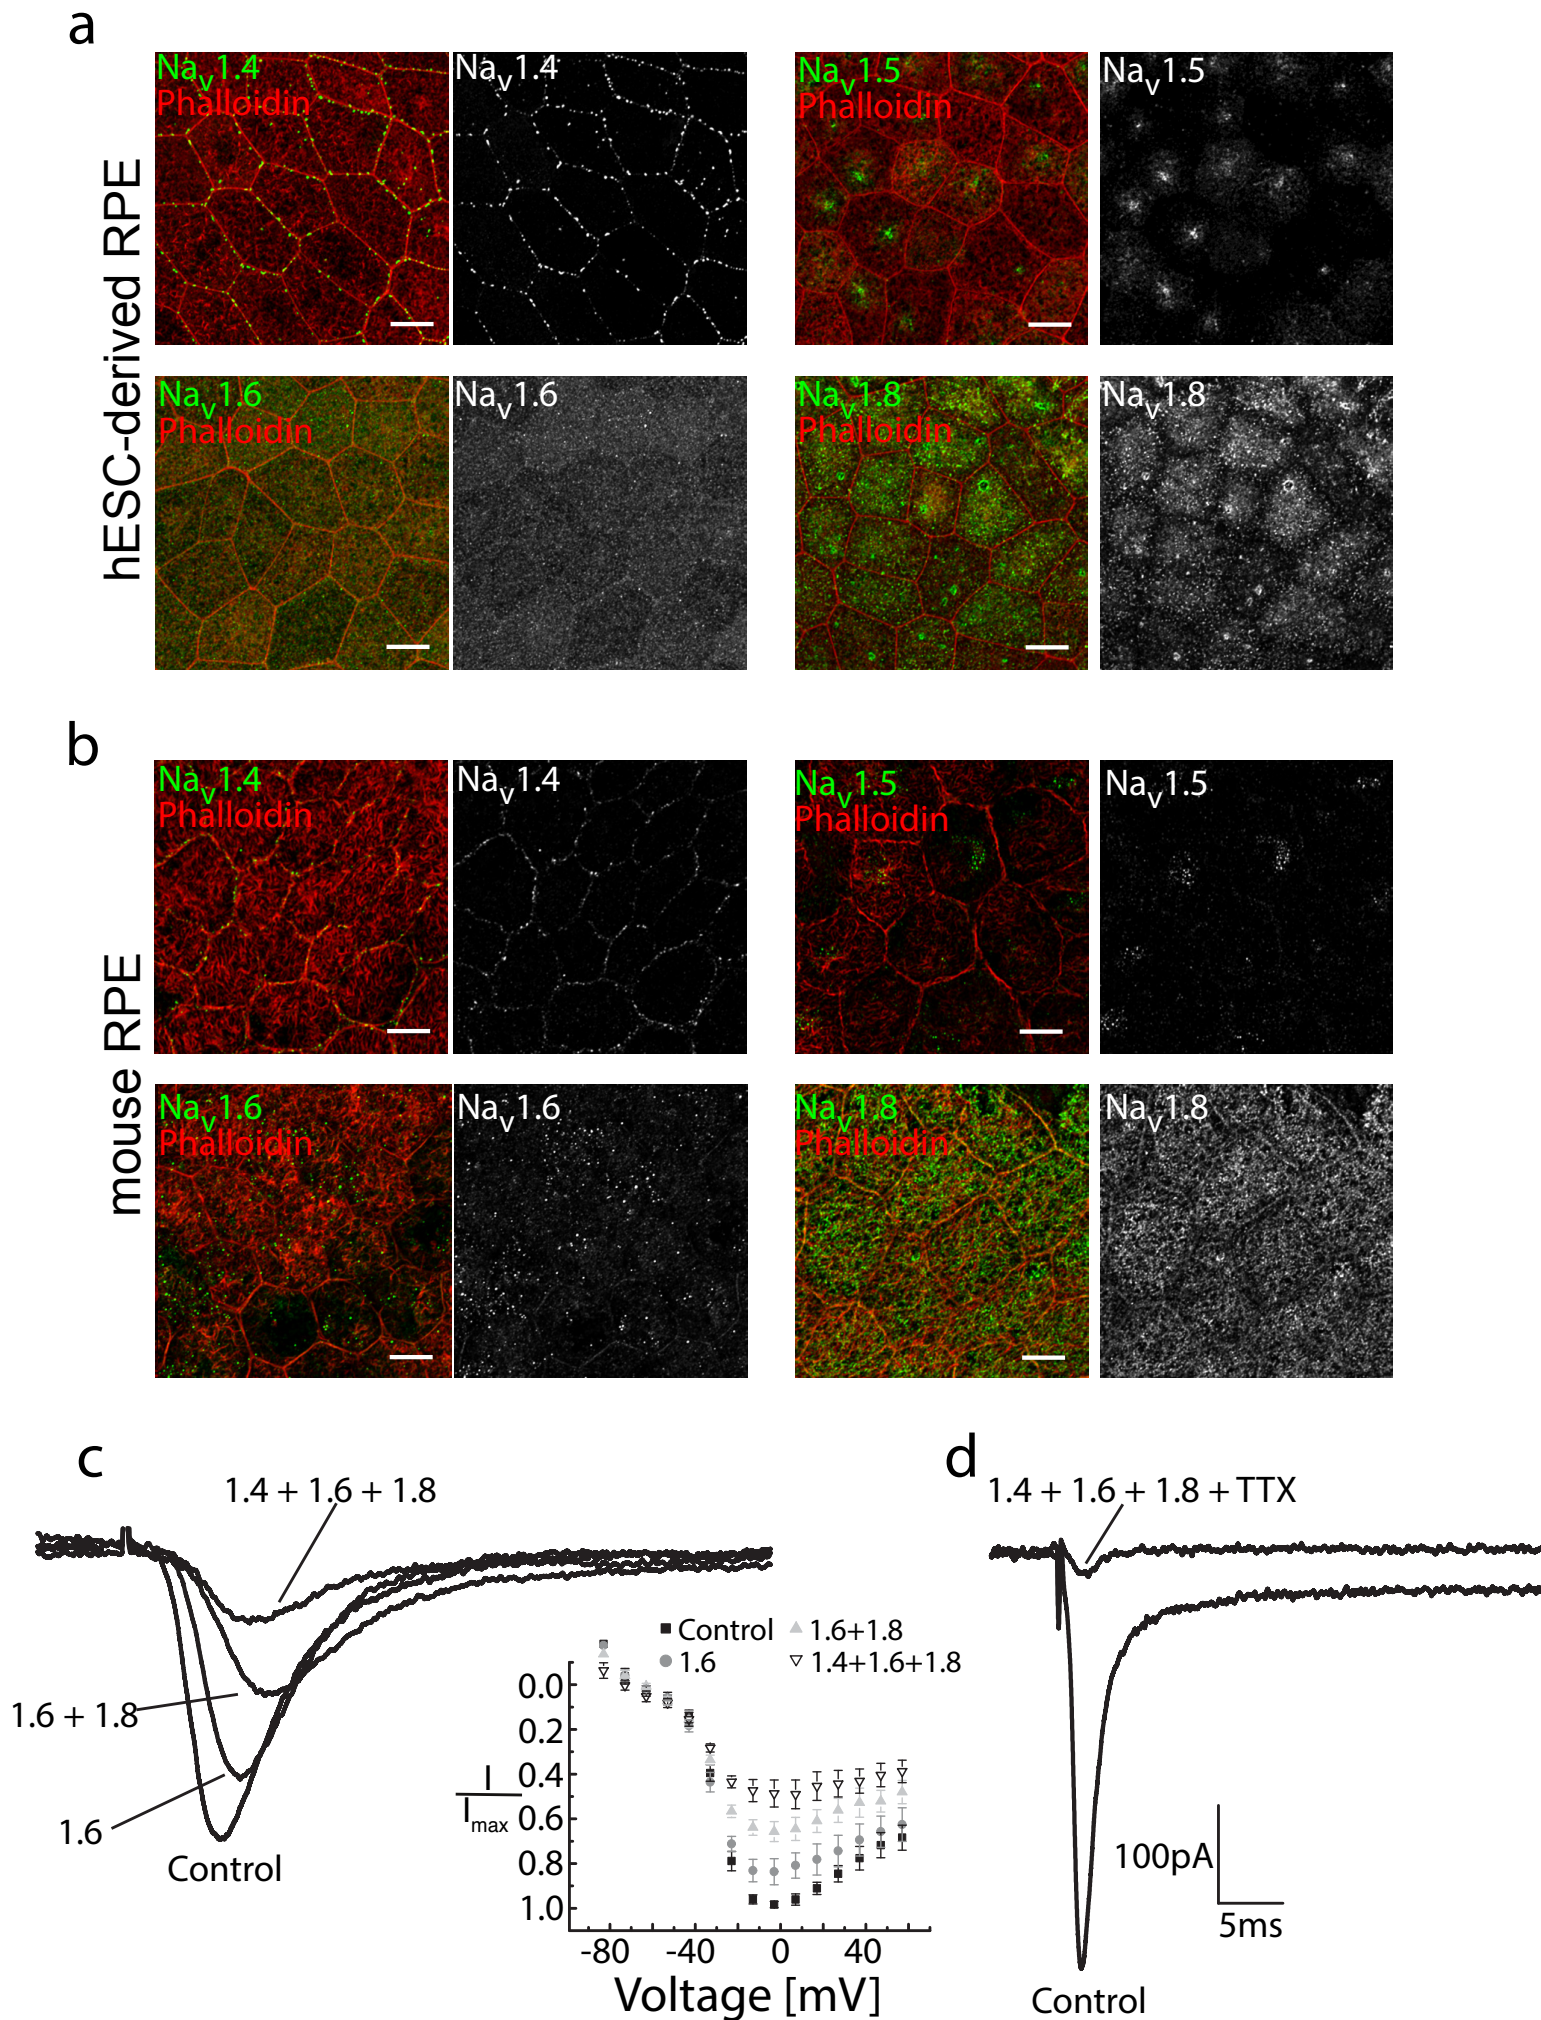



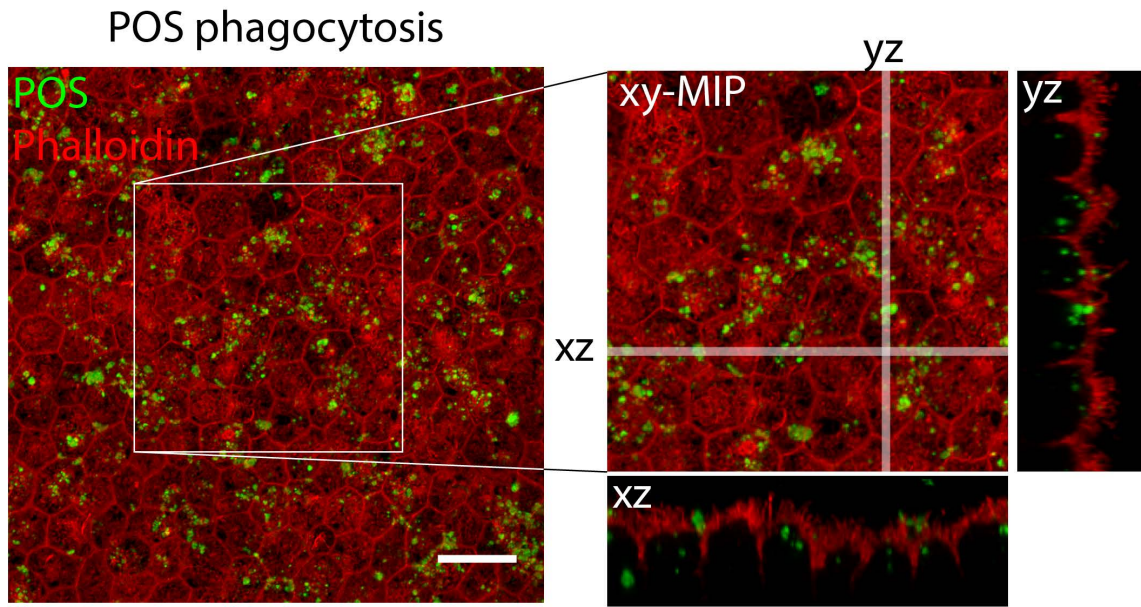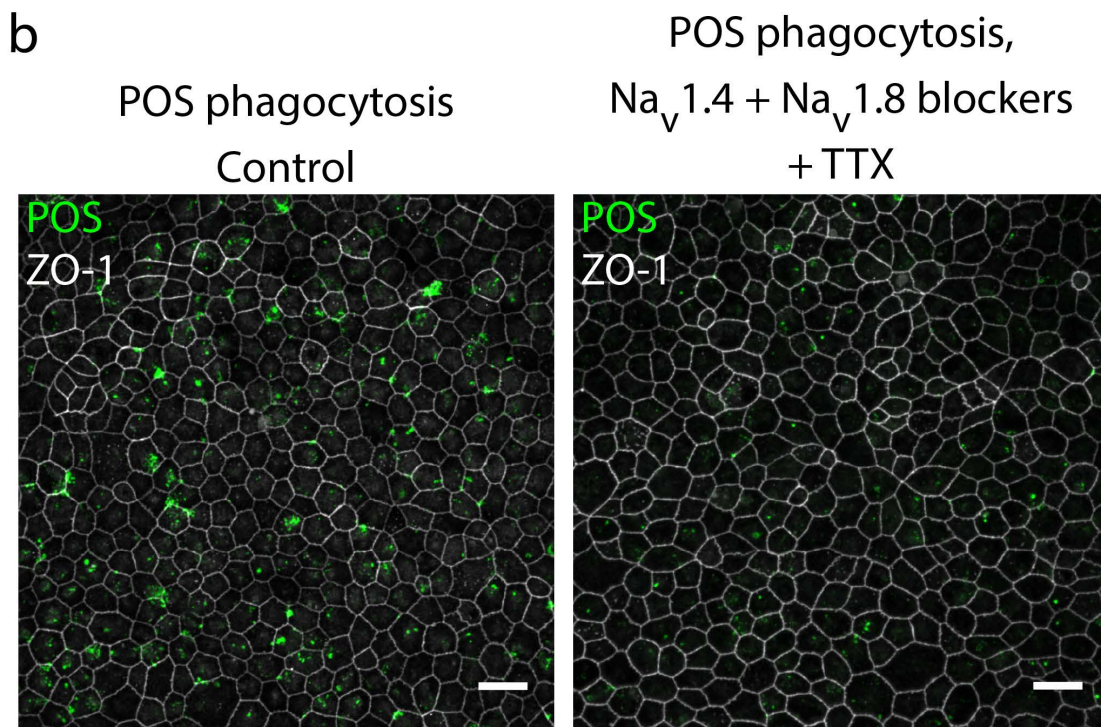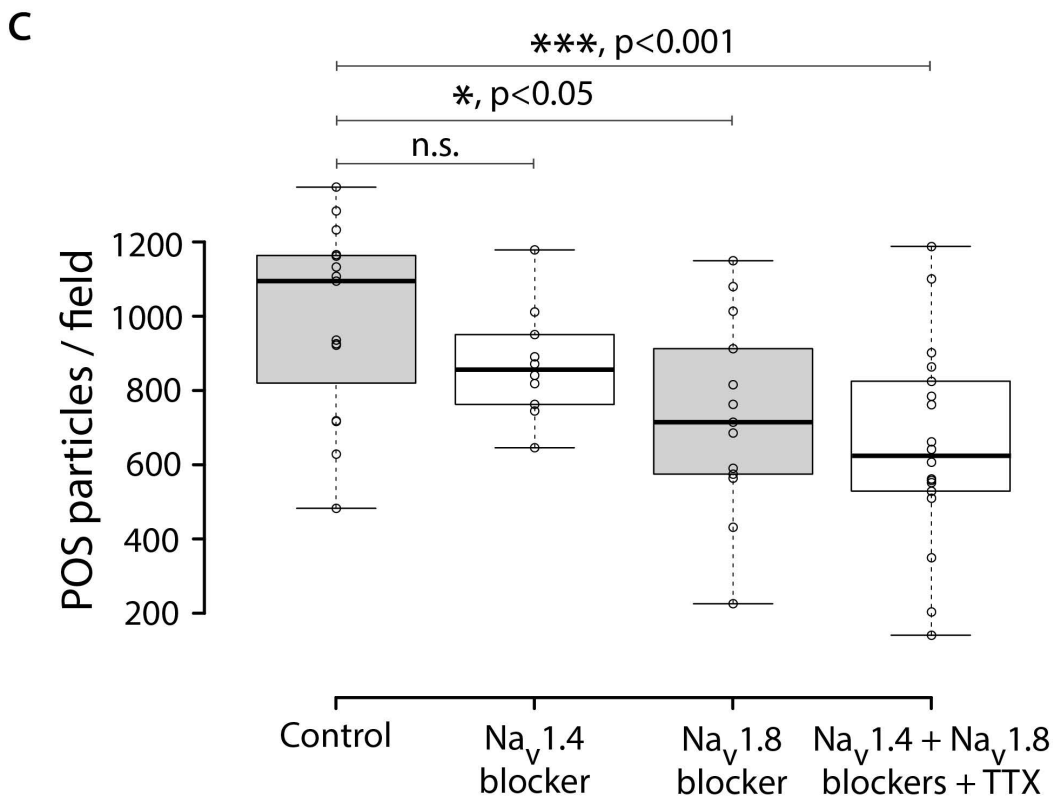



# Phagocytosis *in vivo*

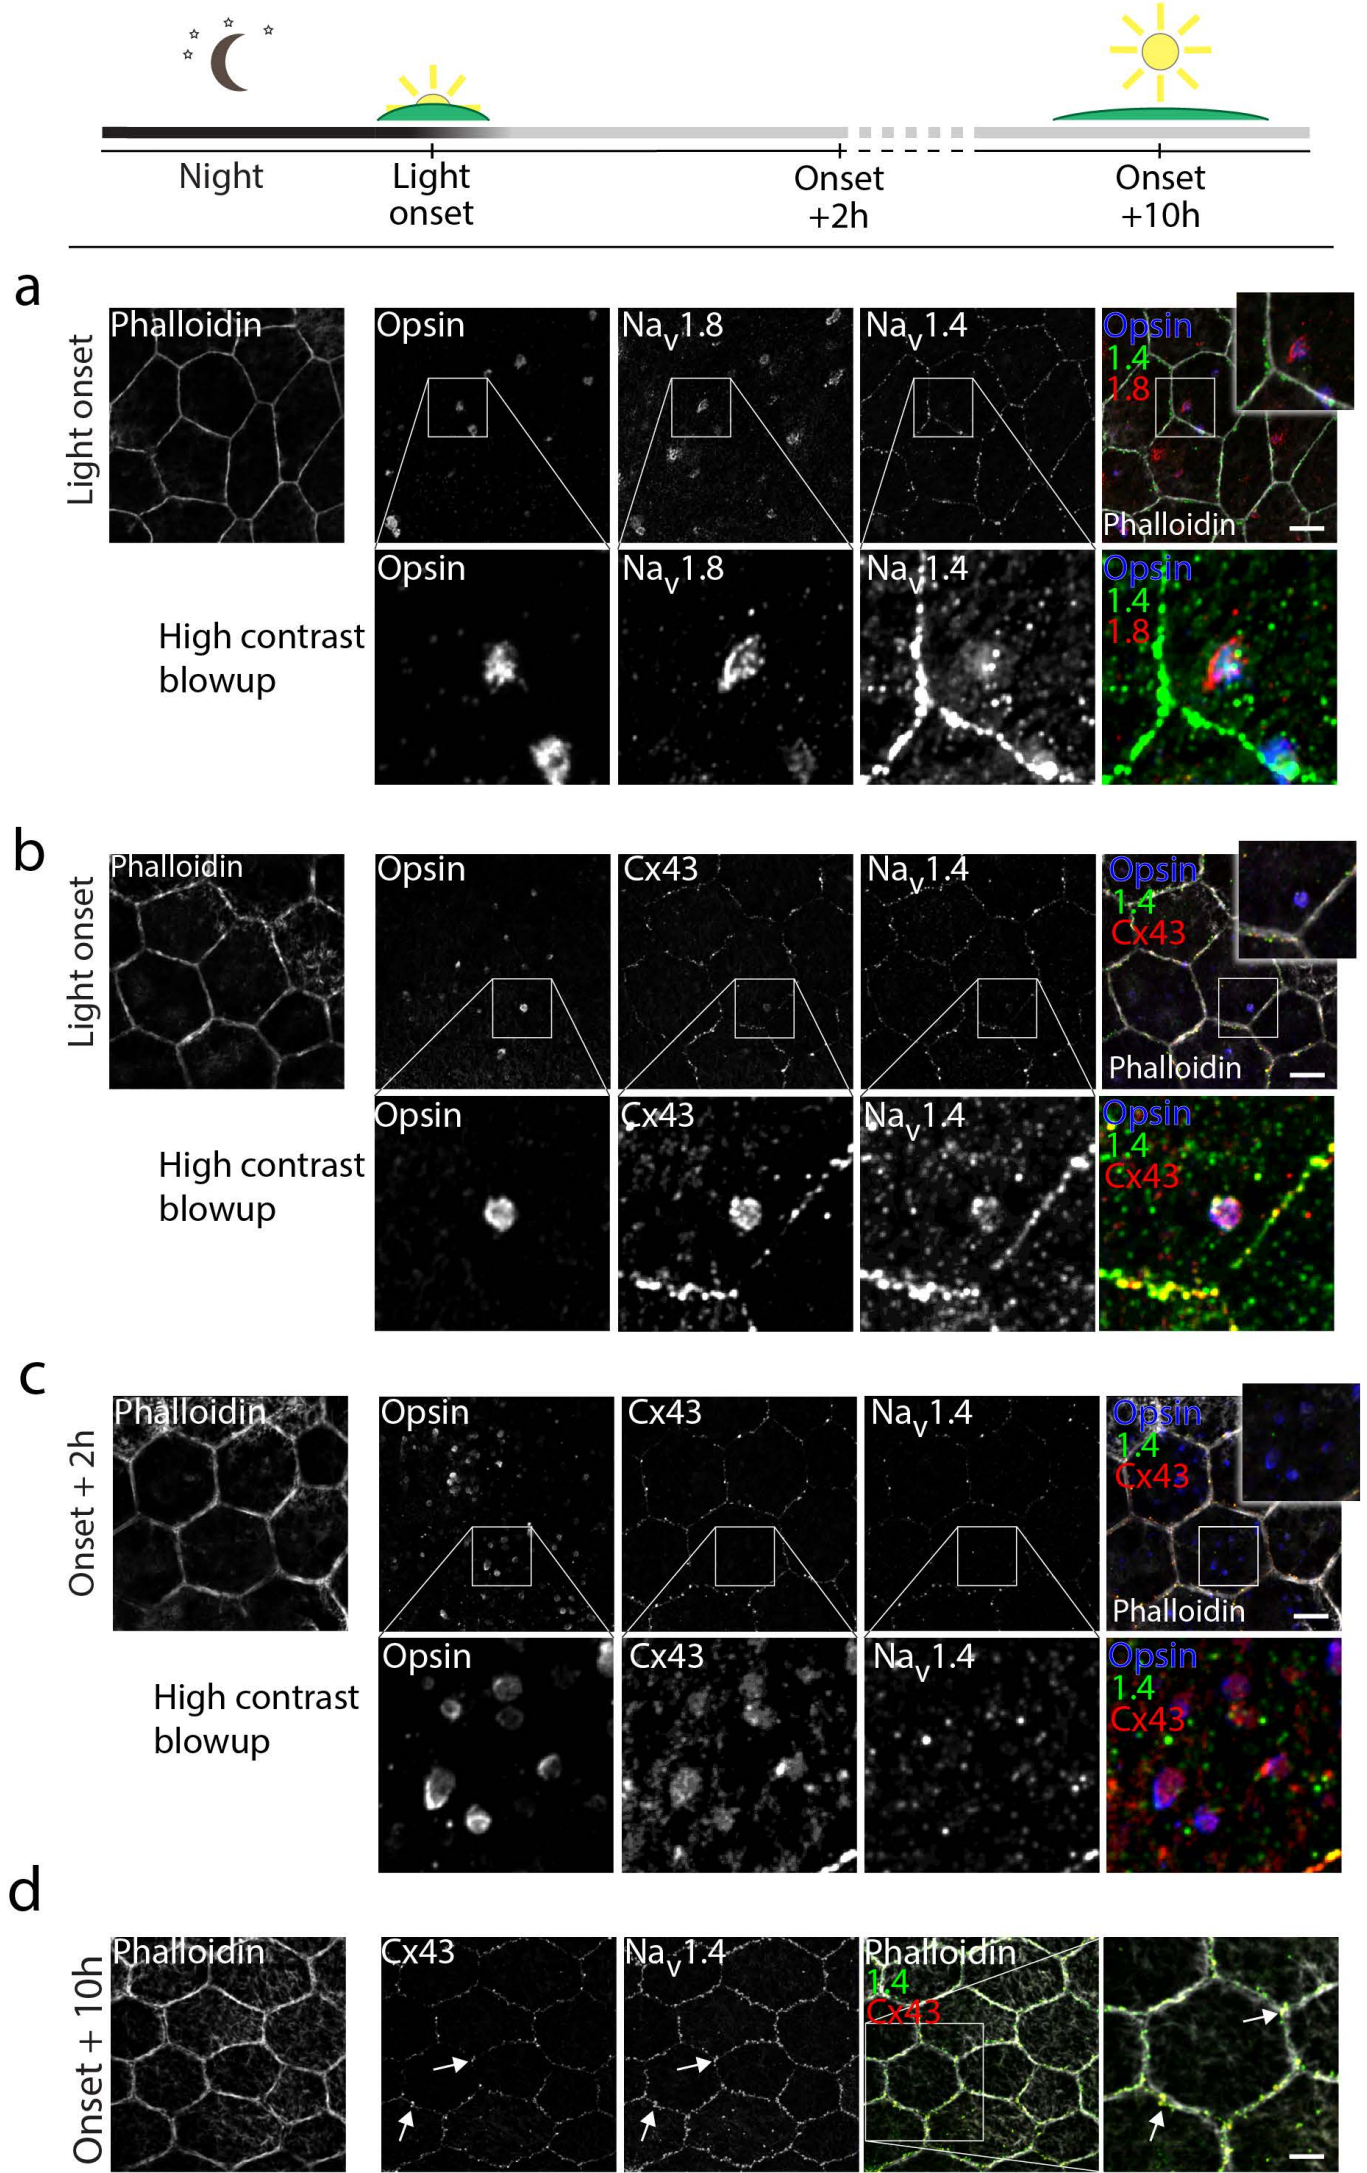



## Phagocytosis *in vivo*

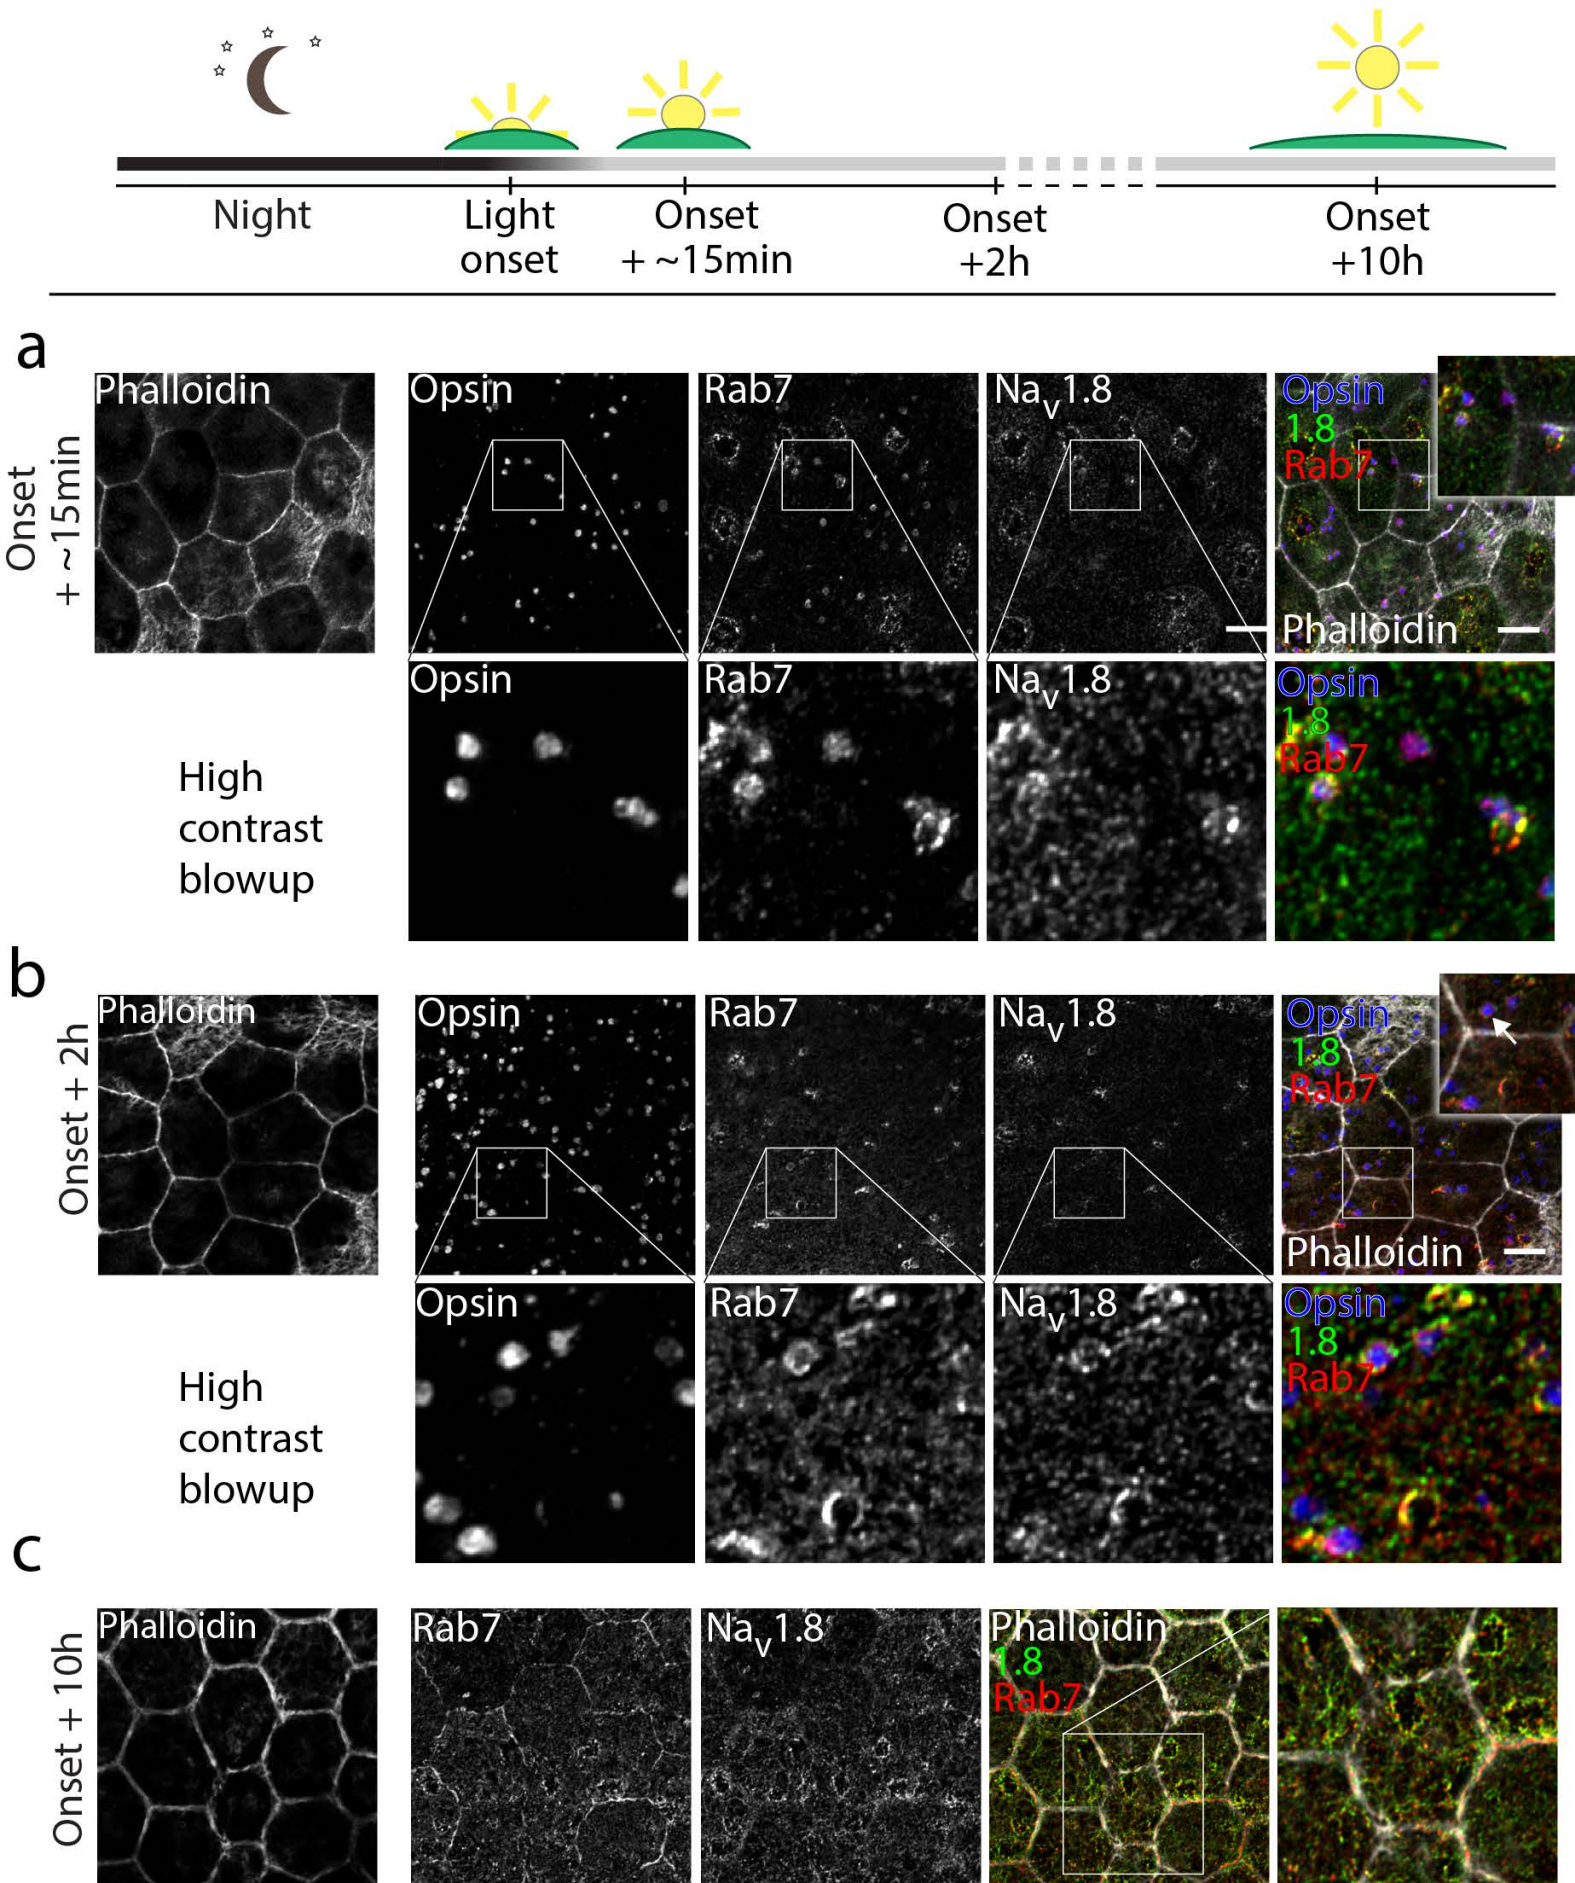



a

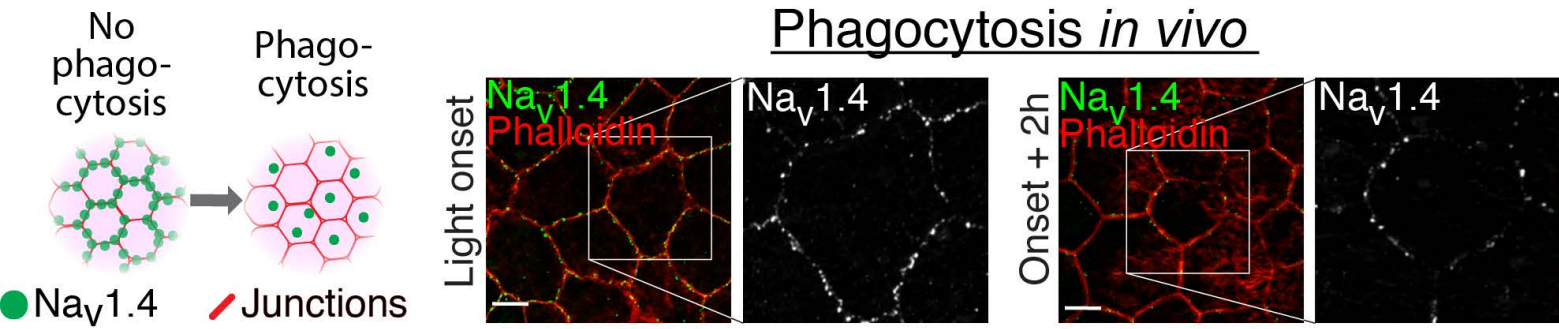

b

**ex vivo phagocytosis assay**

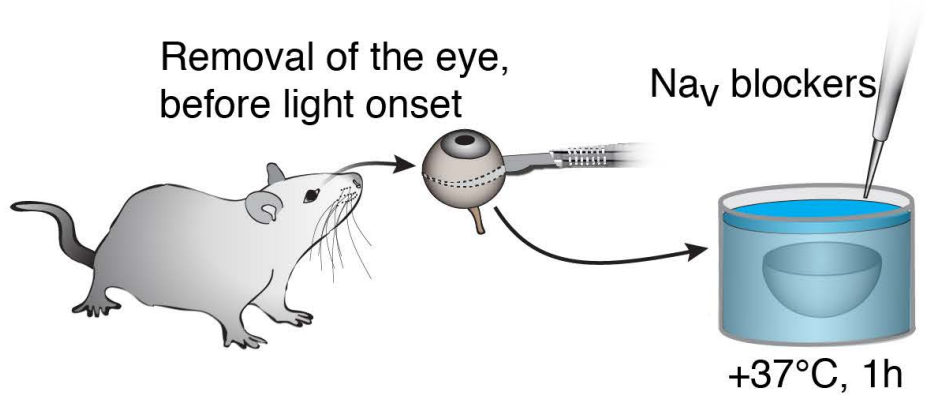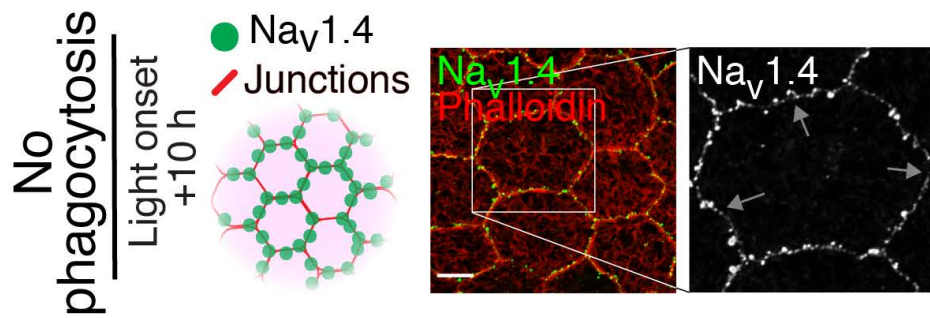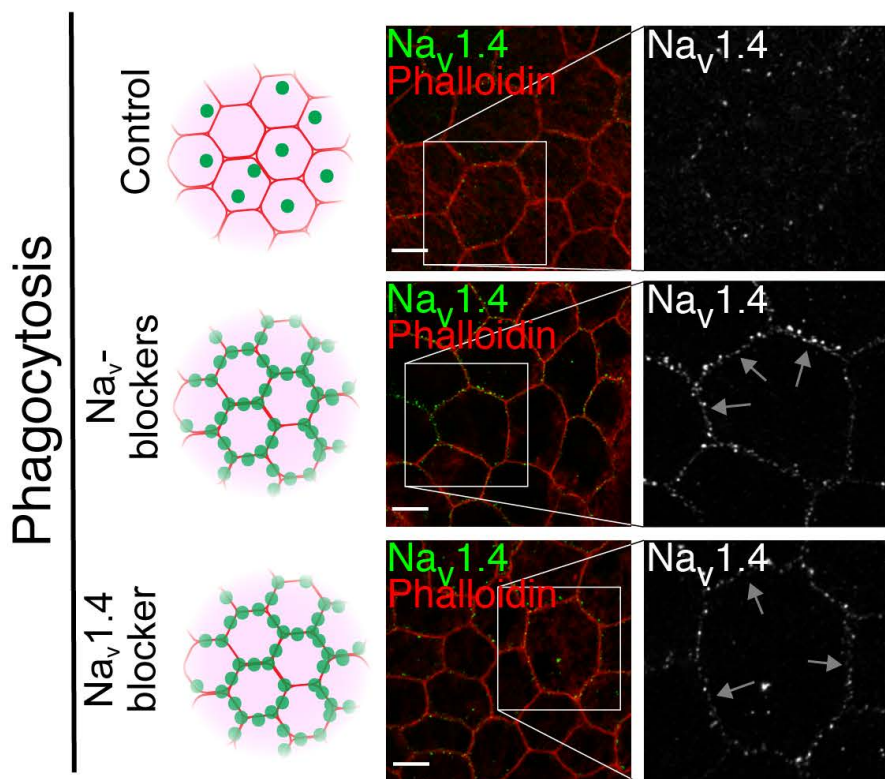

**c hESC-RPE phagocytosis assay**

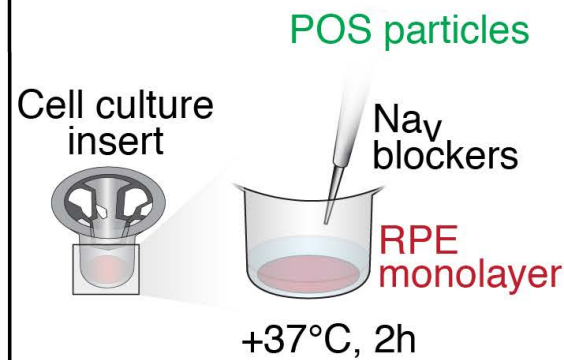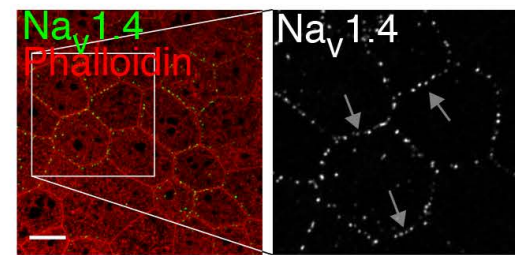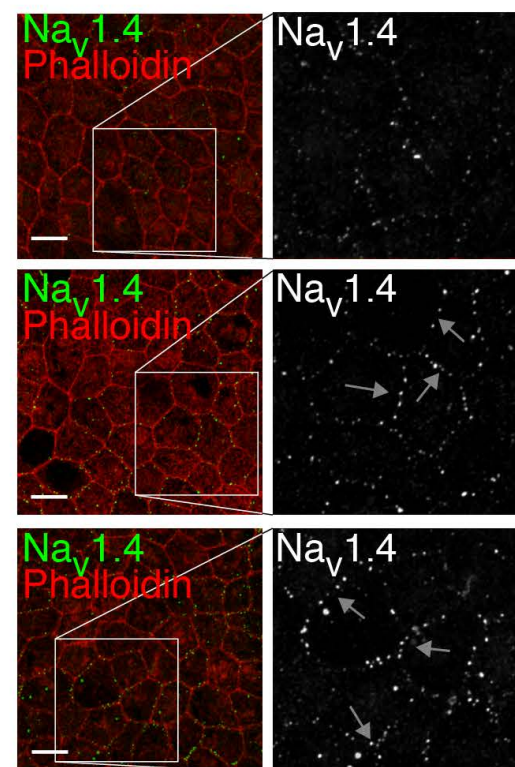

Source: https://www.biorxiv.org/content/10.1101/223719v1.full.pdf
